# Supplementary material for: Theoretical study on mechanism of the photochemical ligand substitution of fac-[ReI(bpy)(CO)3(PR3)]+ complex
Source: Royal Society of Chemistry journal article supplement (doi:10.1039/c6cp02314b), 2016-01-01
Supplement: c6cp02314b1.pdf [file c6cp02314b1.pdf]

**Theoretical study on mechanism of the photochemical ligand  
substitution of  $fac-[Re^I(bpy)(CO)_3(PR_3)]^+$  complex:  
Supplementary Information**

Kenichiro Saita,<sup>\*a</sup> Yu Harabuchi<sup>a</sup>, Tetsuya Taketsugu<sup>a</sup>, Osamu Ishitani<sup>b</sup> and  
Satoshi Maeda<sup>\*a</sup>

<sup>a</sup> *Department of Chemistry, Faculty of Science, Hokkaido University, Kita 10, Nishi 8,  
Kita-ku, Sapporo 060-0810, Japan*

<sup>b</sup> *Department of Chemistry, Graduate School of Science and Engineering, Tokyo Institute of  
Technology, O-okayama 2-12-1, NE-1, Meguro-ku, Tokyo 152-8551, Japan*

\* Corresponding authors. Tel./Fax.: +81 11 706 4921 (KS, SM).

E-mail address: ksaita@mail.sci.hokudai.ac.jp (KS), smaeda@mail.sci.hokudai.ac.jp (SM).

## The Excited States and the Relaxation Pathway

Table S1. Cartesian coordinates (in Å) of the ground state equilibrium structure ( $S_0$ -min(global)) of *fac*-[Re<sup>I</sup>(bpy)(CO)<sub>3</sub>P(OMe)<sub>3</sub>]<sup>+</sup>. The electronic energy of the  $S_0$  state is -1600.628084 hartree.

| Atom | <i>x</i>        | <i>y</i>        | <i>z</i>        |
|------|-----------------|-----------------|-----------------|
| Re   | 0.225854000000  | -0.908492000000 | -0.377207000000 |
| N    | -1.394219000000 | -0.569810000000 | 1.104419000000  |
| N    | -1.138766000000 | 0.592221000000  | -1.291289000000 |
| C    | -1.464024000000 | -1.187507000000 | 2.301298000000  |
| C    | -0.949460000000 | 1.146234000000  | -2.506543000000 |
| C    | -2.497010000000 | -0.964452000000 | 3.205782000000  |
| C    | -1.823596000000 | 2.080361000000  | -3.052613000000 |
| C    | -3.503996000000 | -0.062893000000 | 2.861462000000  |
| C    | -2.942988000000 | 2.461065000000  | -2.312895000000 |
| C    | -3.438185000000 | 0.580101000000  | 1.627837000000  |
| C    | -3.145607000000 | 1.892976000000  | -1.057566000000 |
| C    | -2.371753000000 | 0.313296000000  | 0.761458000000  |
| C    | -2.229630000000 | 0.957949000000  | -0.562132000000 |
| H    | -0.659739000000 | -1.883729000000 | 2.534228000000  |
| H    | -0.064613000000 | 0.823974000000  | -3.052808000000 |
| H    | -2.501024000000 | -1.493483000000 | 4.158516000000  |

|   |                 |                 |                 |
|---|-----------------|-----------------|-----------------|
| H | -1.620314000000 | 2.494324000000  | -4.039986000000 |
| H | -4.331872000000 | 0.139783000000  | 3.541999000000  |
| H | -3.652218000000 | 3.190878000000  | -2.705237000000 |
| H | -4.215102000000 | 1.286862000000  | 1.344329000000  |
| H | -4.014661000000 | 2.178686000000  | -0.468782000000 |
| C | 1.525708000000  | -1.011882000000 | -1.823467000000 |
| O | 2.277017000000  | -1.059571000000 | -2.704181000000 |
| C | 1.259531000000  | -2.189319000000 | 0.660440000000  |
| O | 1.845984000000  | -2.956700000000 | 1.301239000000  |
| P | 1.448156000000  | 1.009876000000  | 0.603857000000  |
| O | 2.846574000000  | 0.797545000000  | 1.453090000000  |
| C | 4.015950000000  | 0.213909000000  | 0.837451000000  |
| H | 4.811103000000  | 0.265686000000  | 1.591525000000  |
| H | 4.316836000000  | 0.781925000000  | -0.055772000000 |
| H | 3.835593000000  | -0.837876000000 | 0.568901000000  |
| O | 0.572403000000  | 1.802816000000  | 1.731642000000  |
| C | 1.098544000000  | 2.691169000000  | 2.751448000000  |
| H | 1.991400000000  | 2.257194000000  | 3.219697000000  |
| H | 0.297210000000  | 2.799245000000  | 3.492860000000  |
| H | 1.335746000000  | 3.673326000000  | 2.318399000000  |
| O | 1.845070000000  | 2.065542000000  | -0.592461000000 |
| C | 2.523550000000  | 3.324529000000  | -0.360193000000 |
| H | 3.273036000000  | 3.231335000000  | 0.439028000000  |

|   |                 |                 |                 |
|---|-----------------|-----------------|-----------------|
| H | 3.021209000000  | 3.587234000000  | -1.302350000000 |
| H | 1.787543000000  | 4.100237000000  | -0.102413000000 |
| C | -0.806882000000 | -2.391736000000 | -1.186673000000 |
| O | -1.392239000000 | -3.260445000000 | -1.665820000000 |

Table S2. Cartesian coordinates (in Å) of the minimum-energy conical intersection for the  $S_3/S_2$  state ( $S_3/S_2$ -MECI) of *fac*-[Re<sup>I</sup>(bpy)(CO)<sub>3</sub>P(OMe)<sub>3</sub>]<sup>+</sup>. The electronic energy of the MECI is -1600.508368 ( $S_3$ : -1600.508368,  $S_2$ : -1600.508368) hartree.

| Atom | <i>x</i>        | <i>y</i>        | <i>z</i>        |
|------|-----------------|-----------------|-----------------|
| Re   | 0.162935373752  | -0.838254946785 | -0.416285206923 |
| P    | 1.519229857932  | 0.999871097334  | 0.661242634153  |
| N    | -1.392109531488 | -0.631604400280 | 1.095198272502  |
| N    | -1.122392168097 | 0.711204934543  | -1.231939712399 |
| C    | -1.473114589748 | -1.319878996922 | 2.260241577227  |
| C    | -0.937650199111 | 1.365691360038  | -2.406729567002 |
| C    | -2.513900505724 | -1.181001785764 | 3.158950729285  |
| C    | -1.832104268685 | 2.287086080667  | -2.915013535886 |
| C    | -3.550191567628 | -0.267923430586 | 2.841954264324  |
| C    | -3.005663004178 | 2.559473474045  | -2.167581641861 |
| C    | -3.491419550111 | 0.442731055323  | 1.660907728175  |
| C    | -3.215679753058 | 1.908131105173  | -0.969703039942 |

|   |                 |                 |                 |
|---|-----------------|-----------------|-----------------|
| C | -2.404638606938 | 0.267738607982  | 0.763494486803  |
| C | -2.268288947801 | 0.971879822725  | -0.477497840921 |
| H | -0.656388659552 | -2.010294713164 | 2.469165426810  |
| H | -0.023063318527 | 1.131053242170  | -2.950195951608 |
| H | -2.517861965192 | -1.763061140083 | 4.079195522906  |
| H | -1.622603442578 | 2.781965481402  | -3.862026545437 |
| H | -4.389333512250 | -0.123811699815 | 3.524494375652  |
| H | -3.739854296437 | 3.279189085937  | -2.533350999603 |
| H | -4.284165549308 | 1.146941388570  | 1.413872410941  |
| H | -4.117732621282 | 2.112082438951  | -0.395122261268 |
| O | 2.828281511679  | 0.652329075366  | 1.583352423100  |
| C | 4.057177407589  | 0.115171680727  | 1.032168289288  |
| H | 4.817614524507  | 0.253435233052  | 1.810183207902  |
| H | 4.350769942646  | 0.658268952589  | 0.122496475451  |
| H | 3.944134802735  | -0.956598072270 | 0.813344169956  |
| O | 2.047406797859  | 2.000270553188  | -0.518674037370 |
| C | 2.708808261768  | 3.266189489986  | -0.249527451293 |
| H | 3.448626208385  | 3.162044633462  | 0.556989256671  |
| H | 1.957772824315  | 4.024638774637  | 0.013534310287  |
| H | 3.212964759932  | 3.548468442616  | -1.181516117409 |
| O | 0.619751534357  | 1.839512936646  | 1.719105338691  |
| C | 1.117035497593  | 2.587577738095  | 2.864935158994  |
| H | 1.861606549636  | 1.998309359879  | 3.414488652268  |

|   |                 |                 |                 |
|---|-----------------|-----------------|-----------------|
| H | 0.238098261017  | 2.775270464180  | 3.492857422851  |
| H | 1.551498836864  | 3.540977976030  | 2.533235774313  |
| C | -0.809699464243 | -2.355639357391 | -1.326439787243 |
| O | -1.323062871763 | -3.231053235261 | -1.852480166528 |
| C | 1.452592102755  | -0.780561188260 | -1.926676917750 |
| O | 2.175522288552  | -0.738539934336 | -2.818841141904 |
| C | 1.201394136801  | -2.149883804465 | 0.654213068072  |
| O | 1.775008912930  | -2.907848780026 | 1.300631945760  |

Table S3. Cartesian coordinates (in Å) of the  $S_2$  state equilibrium structure ( $S_2$ -min) of *fac*-[Re<sup>I</sup>(bpy)(CO)<sub>3</sub>P(OMe)<sub>3</sub>]<sup>+</sup>. The electronic energy of the  $S_2$  state is -1600.513264 hartree.

| Atom | <i>x</i>        | <i>y</i>        | <i>z</i>        |
|------|-----------------|-----------------|-----------------|
| Re   | 0.196588026764  | -0.883577321621 | -0.445462539828 |
| P    | 1.444870896567  | 0.971721988374  | 0.671902604987  |
| N    | -1.330426460773 | -0.652807309822 | 1.073213870540  |
| N    | -1.082790665892 | 0.676491459260  | -1.225443783397 |
| C    | -1.387318696272 | -1.344157990682 | 2.242977614109  |
| C    | -0.895539557369 | 1.323097049209  | -2.407992092779 |
| C    | -2.394751167337 | -1.185000943508 | 3.169352645077  |
| C    | -1.758432482924 | 2.281853886644  | -2.890158678412 |
| C    | -3.429480890724 | -0.252984304329 | 2.887447692929  |

|   |                 |                 |                 |
|---|-----------------|-----------------|-----------------|
| C | -2.905386498281 | 2.608695544099  | -2.116701296442 |
| C | -3.391696099651 | 0.459294576165  | 1.711181277536  |
| C | -3.117300503666 | 1.964184915201  | -0.920006236347 |
| C | -2.332554361888 | 0.272435391135  | 0.780805773520  |
| C | -2.202177711575 | 0.982004374600  | -0.449803428818 |
| H | -0.579431931051 | -2.052105063399 | 2.429371267725  |
| H | -0.007304636398 | 1.048381804349  | -2.976764907826 |
| H | -2.380175877233 | -1.768904281209 | 4.088533428638  |
| H | -1.549984716115 | 2.764778566432  | -3.843772375946 |
| H | -4.246273912385 | -0.102500863690 | 3.594875186331  |
| H | -3.612616103860 | 3.361283845105  | -2.468178893645 |
| H | -4.178026259469 | 1.178093385860  | 1.484851517681  |
| H | -3.994277534279 | 2.205202983166  | -0.320676222899 |
| O | 2.739801740495  | 0.686734843496  | 1.645040829515  |
| C | 3.976200918285  | 0.133934682430  | 1.136675666397  |
| H | 4.718385140331  | 0.277085467560  | 1.931409896911  |
| H | 4.299491988569  | 0.660165797384  | 0.226524997936  |
| H | 3.864714093304  | -0.941152999362 | 0.930142623433  |
| O | 1.996133268051  | 1.972720218172  | -0.503260582282 |
| C | 2.632786328097  | 3.248866391761  | -0.234315541912 |
| H | 3.343253808232  | 3.170049120011  | 0.601392014022  |
| H | 1.865778494290  | 4.005190531165  | -0.014391444311 |
| H | 3.169144063634  | 3.521263002065  | -1.151430855261 |

|   |                 |                 |                 |
|---|-----------------|-----------------|-----------------|
| O | 0.498311994651  | 1.804149761941  | 1.696383944083  |
| C | 0.948865346637  | 2.681269129451  | 2.764494993654  |
| H | 1.880492702885  | 2.307666094929  | 3.207344993503  |
| H | 0.145844846133  | 2.677598434546  | 3.511664042126  |
| H | 1.089419752505  | 3.698485249245  | 2.372860274314  |
| C | -0.942756524657 | -2.242187973751 | -1.353288360365 |
| O | -1.593585030747 | -3.019128296868 | -1.884237489786 |
| C | 1.526550120213  | -0.910317750076 | -1.968936177967 |
| O | 2.271536370179  | -0.932851327232 | -2.836229786985 |
| C | 1.242766594718  | -2.341038195161 | 0.487065123179  |
| O | 1.818663127986  | -3.182434873038 | 1.006189417033  |

Table S4. Cartesian coordinates (in Å) of the minimum-energy conical intersection for the  $S_2/S_1$  state ( $S_2/S_1$ -MECI) of *fac*-[Re<sup>I</sup>(bpy)(CO)<sub>3</sub>P(OMe)<sub>3</sub>]<sup>+</sup>. The electronic energy of the MECI is -1600.513292 ( $S_3$ : -1600.513292,  $S_2$ : -1600.513292) hartree.

| Atom | <i>x</i>        | <i>y</i>        | <i>z</i>        |
|------|-----------------|-----------------|-----------------|
| Re   | 0.162935373752  | -0.838254946785 | -0.416285206923 |
| P    | 1.519229857932  | 0.999871097334  | 0.661242634153  |
| N    | -1.392109531488 | -0.631604400280 | 1.095198272502  |
| N    | -1.122392168097 | 0.711204934543  | -1.231939712399 |
| C    | -1.473114589748 | -1.319878996922 | 2.260241577227  |



|   |                 |                 |                 |
|---|-----------------|-----------------|-----------------|
| C | -0.937650199111 | 1.365691360038  | -2.406729567002 |
| C | -2.513900505724 | -1.181001785764 | 3.158950729285  |
| C | -1.832104268685 | 2.287086080667  | -2.915013535886 |
| C | -3.550191567628 | -0.267923430586 | 2.841954264324  |
| C | -3.005663004178 | 2.559473474045  | -2.167581641861 |
| C | -3.491419550111 | 0.442731055323  | 1.660907728175  |
| C | -3.215679753058 | 1.908131105173  | -0.969703039942 |
| C | -2.404638606938 | 0.267738607982  | 0.763494486803  |
| C | -2.268288947801 | 0.971879822725  | -0.477497840921 |
| H | -0.656388659552 | -2.010294713164 | 2.469165426810  |
| H | -0.023063318527 | 1.131053242170  | -2.950195951608 |
| H | -2.517861965192 | -1.763061140083 | 4.079195522906  |
| H | -1.622603442578 | 2.781965481402  | -3.862026545437 |
| H | -4.389333512250 | -0.123811699815 | 3.524494375652  |
| H | -3.739854296437 | 3.279189085937  | -2.533350999603 |
| H | -4.284165549308 | 1.146941388570  | 1.413872410941  |
| H | -4.117732621282 | 2.112082438951  | -0.395122261268 |
| O | 2.828281511679  | 0.652329075366  | 1.583352423100  |
| C | 4.057177407589  | 0.115171680727  | 1.032168289288  |
| H | 4.817614524507  | 0.253435233052  | 1.810183207902  |
| H | 4.350769942646  | 0.658268952589  | 0.122496475451  |
| H | 3.944134802735  | -0.956598072270 | 0.813344169956  |
| O | 2.047406797859  | 2.000270553188  | -0.518674037370 |

|   |                 |                 |                 |
|---|-----------------|-----------------|-----------------|
| C | 2.708808261768  | 3.266189489986  | -0.249527451293 |
| H | 3.448626208385  | 3.162044633462  | 0.556989256671  |
| H | 1.957772824315  | 4.024638774637  | 0.013534310287  |
| H | 3.212964759932  | 3.548468442616  | -1.181516117409 |
| O | 0.619751534357  | 1.839512936646  | 1.719105338691  |
| C | 1.117035497593  | 2.587577738095  | 2.864935158994  |
| H | 1.861606549636  | 1.998309359879  | 3.414488652268  |
| H | 0.238098261017  | 2.775270464180  | 3.492857422851  |
| H | 1.551498836864  | 3.540977976030  | 2.533235774313  |
| C | -0.809699464243 | -2.355639357391 | -1.326439787243 |
| O | -1.323062871763 | -3.231053235261 | -1.852480166528 |
| C | 1.452592102755  | -0.780561188260 | -1.926676917750 |
| O | 2.175522288552  | -0.738539934336 | -2.818841141904 |
| C | 1.201394136801  | -2.149883804465 | 0.654213068072  |
| O | 1.775008912930  | -2.907848780026 | 1.300631945760  |

Table S5. Cartesian coordinates (in Å) of the  $S_1$  state equilibrium structure ( $S_1$ -min) of *fac*-[Re<sup>I</sup>(bpy)(CO)<sub>3</sub>P(OMe)<sub>3</sub>]<sup>+</sup>. The electronic energy of the  $S_1$  state is -1600.517331 hartree.

| Atom | <i>x</i>       | <i>y</i>        | <i>z</i>        |
|------|----------------|-----------------|-----------------|
| Re   | 0.180826727670 | -0.880662516638 | -0.437846189580 |
| P    | 1.442511993738 | 0.974628586585  | 0.699759715762  |

|   |                 |                 |                 |
|---|-----------------|-----------------|-----------------|
| N | -1.326404167967 | -0.662599312118 | 1.080850951145  |
| N | -1.089179801519 | 0.676980001757  | -1.226739804600 |
| C | -1.376386229159 | -1.344135344793 | 2.257205324050  |
| C | -0.921675111421 | 1.317385454276  | -2.415164833726 |
| C | -2.384190999593 | -1.187710461120 | 3.183198400738  |
| C | -1.792383087613 | 2.272660109774  | -2.890138538965 |
| C | -3.423358642878 | -0.260214173497 | 2.897738980149  |
| C | -2.932330828349 | 2.598915960627  | -2.103542758557 |
| C | -3.392642513852 | 0.450742179997  | 1.720424748234  |
| C | -3.131347634916 | 1.958728104549  | -0.902964595873 |
| C | -2.335316325433 | 0.264973556370  | 0.786719736168  |
| C | -2.207763767520 | 0.979238157663  | -0.438909582922 |
| H | -0.560312785057 | -2.043768098762 | 2.439167746704  |
| H | -0.037677468197 | 1.037318187658  | -2.988397956933 |
| H | -2.368915542903 | -1.767618526437 | 4.104918638306  |
| H | -1.598341012237 | 2.754489226252  | -3.847443116202 |
| H | -4.238350091416 | -0.109335239305 | 3.607375441467  |
| H | -3.645543958746 | 3.348204759563  | -2.450265149711 |
| H | -4.182331506534 | 1.166762911191  | 1.497717768244  |
| H | -4.003946410596 | 2.199480733761  | -0.297334835022 |
| O | 2.722945238625  | 0.667529815722  | 1.677608672893  |
| C | 3.975669056185  | 0.137736441209  | 1.177335323746  |
| H | 4.708227026183  | 0.298309840480  | 1.977424509691  |

|   |                 |                 |                 |
|---|-----------------|-----------------|-----------------|
| H | 4.292744632569  | 0.668192925891  | 0.268066946304  |
| H | 3.883686394999  | -0.938920896751 | 0.973543253427  |
| O | 2.000138862701  | 1.943986281926  | -0.490427955618 |
| C | 2.661800484304  | 3.216902708062  | -0.255007620757 |
| H | 3.342795040081  | 3.155333297746  | 0.605829686492  |
| H | 1.906007797231  | 3.997973501879  | -0.091457028472 |
| H | 3.233472985375  | 3.435073052450  | -1.165115618350 |
| O | 0.492415789131  | 1.810899693224  | 1.710559035782  |
| C | 0.941555386574  | 2.703701604500  | 2.768702791601  |
| H | 1.850334348441  | 2.313907281581  | 3.243745702800  |
| H | 0.119376045674  | 2.740185261452  | 3.493360098947  |
| H | 1.120335161253  | 3.705795148802  | 2.354829453237  |
| C | -0.979818438220 | -2.168916487843 | -1.497532612766 |
| O | -1.626633735339 | -2.877631023188 | -2.112917094224 |
| C | 1.520893533344  | -0.994103371437 | -1.914184555919 |
| O | 2.287166026677  | -1.070284485782 | -2.765292556653 |
| C | 1.296500661392  | -2.274375439282 | 0.448596890382  |
| O | 1.932758867335  | -3.084210407972 | 0.956653588653  |

---

Table S6. Cartesian coordinates (in Å) of the minimum-energy seam of crossing for the  $S_1/T_2$  state ( $S_1/T_2$ -MESX) of *fac*-[Re<sup>I</sup>(bpy)(CO)<sub>3</sub>P(OMe)<sub>3</sub>]<sup>+</sup>. The electronic energy of the MESX is -1600.516097 ( $S_1$ : -1600.516096,  $S_2$ : -1600.516098) hartree.

| Atom | <i>x</i>        | <i>y</i>        | <i>z</i>        |
|------|-----------------|-----------------|-----------------|
| Re   | 0.177277682851  | -0.873283202011 | -0.438071075756 |
| P    | 1.486444710993  | 0.972079376988  | 0.681551121403  |
| N    | -1.331479244858 | -0.648192010020 | 1.079294365724  |
| N    | -1.084299349555 | 0.688101299340  | -1.224881670512 |
| C    | -1.386337529556 | -1.330279823827 | 2.257421776572  |
| C    | -0.909386475187 | 1.340771736079  | -2.409032226322 |
| C    | -2.393439187806 | -1.169449632927 | 3.182632591029  |
| C    | -1.781707759167 | 2.290368533674  | -2.888302245515 |
| C    | -3.433101691940 | -0.245050019760 | 2.893212122728  |
| C    | -2.937900928807 | 2.599608089916  | -2.116207933812 |
| C    | -3.399622015861 | 0.462695892879  | 1.710770979331  |
| C    | -3.141383178540 | 1.954278533787  | -0.917125900596 |
| C    | -2.343146452603 | 0.273427027074  | 0.782309859698  |
| C    | -2.214952578868 | 0.984263509941  | -0.448990673039 |
| H    | -0.570562057974 | -2.028668883495 | 2.443533581593  |
| H    | -0.015107391285 | 1.075673589190  | -2.972685554589 |
| H    | -2.378803584583 | -1.746468750956 | 4.106076427720  |
| H    | -1.583145919814 | 2.777429279649  | -3.842000882703 |
| H    | -4.248681656515 | -0.090866973497 | 3.601205696494  |
| H    | -3.653945547850 | 3.343715173153  | -2.467789444539 |
| H    | -4.190717991165 | 1.175988880566  | 1.484062613642  |

|   |                 |                 |                 |
|---|-----------------|-----------------|-----------------|
| H | -4.023499778229 | 2.183896748639  | -0.320986962829 |
| O | 2.755970040332  | 0.684369412513  | 1.676670041046  |
| C | 4.006657465962  | 0.119633015528  | 1.212708521471  |
| H | 4.724843543761  | 0.277680840457  | 2.026235245752  |
| H | 4.355869157227  | 0.631394236986  | 0.304328943709  |
| H | 3.894232050009  | -0.957082810678 | 1.021058937107  |
| O | 2.051215544152  | 1.911911429998  | -0.528813820625 |
| C | 2.630605394081  | 3.230270142404  | -0.337847528701 |
| H | 3.392868278700  | 3.217046949753  | 0.454638977721  |
| H | 1.837487670371  | 3.951356884323  | -0.094292206798 |
| H | 3.094914942931  | 3.493554448591  | -1.295732049223 |
| O | 0.534359542929  | 1.841727913739  | 1.661985653196  |
| C | 0.959302217245  | 2.635810583532  | 2.805197541426  |
| H | 1.879065426115  | 2.227143246284  | 3.240169131001  |
| H | 0.137673875295  | 2.580434476650  | 3.529617227653  |
| H | 1.113328822208  | 3.675506274911  | 2.484896341110  |
| C | -0.946127109885 | -2.222825139227 | -1.457919526881 |
| O | -1.561996360393 | -2.974839460029 | -2.055908986832 |
| C | 1.511444663015  | -0.896550509605 | -1.920489124332 |
| O | 2.271930268697  | -0.910470263355 | -2.780680028906 |
| C | 1.237136162168  | -2.278895317842 | 0.486781600850  |
| O | 1.834028331417  | -3.095665729317 | 1.032049544621  |

---

Table S7. Cartesian coordinates (in Å) of the minimum-energy conical intersection for the  $T_2/T_1$  state ( $T_2/T_1$ -MECI) of *fac*-[Re<sup>I</sup>(bpy)(CO)<sub>3</sub>P(OMe)<sub>3</sub>]<sup>+</sup>. The electronic energy of the MECI is -1600.517611 ( $T_2$ : -1600.517611,  $T_1$ : -1600.517611) hartree.

| Atom | <i>x</i>        | <i>y</i>        | <i>z</i>        |
|------|-----------------|-----------------|-----------------|
| Re   | -0.953294590825 | -0.152581969412 | 0.003087039528  |
| N    | -0.036952983081 | 1.258389135655  | 1.336515771143  |
| N    | -0.035674709343 | 1.259037836079  | -1.336276461100 |
| C    | -0.089722834808 | 1.231442700476  | 2.702508867738  |
| C    | -0.088539508499 | 1.235653244871  | -2.702646658249 |
| C    | 0.535736549801  | 2.157351831292  | 3.504973812512  |
| C    | 0.537555613692  | 2.157881818919  | -3.507130742233 |
| C    | 1.279732927429  | 3.200560289098  | 2.887751371932  |
| C    | 1.282040973022  | 3.202423714980  | -2.889656200921 |
| C    | 1.344748042245  | 3.254844579731  | 1.508863804825  |
| C    | 1.344730075428  | 3.257517446607  | -1.511671168318 |
| C    | 0.684527896335  | 2.286725377221  | 0.715566534738  |
| C    | 0.685616332209  | 2.288854084949  | -0.716953045885 |
| H    | -0.669223644279 | 0.422160460524  | 3.145617346112  |
| H    | -0.665059996038 | 0.423917047520  | -3.142814101817 |
| H    | 0.452444175352  | 2.077112399775  | 4.588343821709  |
| H    | 0.455515043425  | 2.079697022179  | -4.590325591697 |

|   |                 |                 |                 |
|---|-----------------|-----------------|-----------------|
| H | 1.792988297795  | 3.950917863452  | 3.490690288881  |
| H | 1.793948477312  | 3.953031767883  | -3.493287324641 |
| H | 1.906314447650  | 4.053438276690  | 1.026333152672  |
| H | 1.905903909289  | 4.055773813533  | -1.028889729748 |
| C | -1.644787665507 | -1.293295784671 | -1.467391086400 |
| O | -2.038857868467 | -1.916949266638 | -2.348886726263 |
| C | -1.645389293627 | -1.292216764934 | 1.476508988314  |
| O | -2.039379179371 | -1.920813485797 | 2.354298676385  |
| P | 1.165544020002  | -1.579573223077 | -0.000223383508 |
| O | 1.158992313053  | -3.215012079868 | -0.000975650502 |
| C | 0.002338743085  | -4.083693298777 | -0.000163819959 |
| H | 0.406265279947  | -5.103451501392 | -0.000189906093 |
| H | -0.602877509899 | -3.934319082073 | -0.905355717184 |
| H | -0.602918589148 | -3.933401454753 | 0.904810818721  |
| O | 2.048539003054  | -1.216808109545 | 1.321816342038  |
| C | 3.181104730224  | -1.991737189624 | 1.798421055726  |
| H | 2.966747311723  | -3.066983492884 | 1.739788265553  |
| H | 3.335520704387  | -1.689265049229 | 2.841322956917  |
| H | 4.076683081943  | -1.748710397308 | 1.208927456131  |
| O | 2.045401010108  | -1.218028682514 | -1.325224838994 |
| C | 3.181275033395  | -1.990530769096 | -1.798673777699 |
| H | 2.967720536088  | -3.065937480429 | -1.740073030174 |
| H | 3.336400570393  | -1.690232388360 | -2.842025803430 |



|   |                 |                 |                 |
|---|-----------------|-----------------|-----------------|
| H | 4.075238595540  | -1.746882252722 | -1.206742652470 |
| C | -2.768899446594 | 0.695180395047  | 0.001985408720  |
| O | -3.824685874436 | 1.135217616704  | -0.002554363018 |

---

Table S8. Cartesian coordinates (in Å) of the  $T_1$  state equilibrium structure ( $T_1$ -min(global)) of *fac*-[Re<sup>I</sup>(bpy)(CO)<sub>3</sub>P(OMe)<sub>3</sub>]<sup>+</sup>. The electronic energy of the  $T_1$  state is -1600.534237 hartree. This data has been optimized by the TD-B3LYP calculation.

| Atom | <i>x</i>        | <i>y</i>        | <i>z</i>        |
|------|-----------------|-----------------|-----------------|
| Re   | 0.238571258181  | -0.895256687416 | -0.440388706593 |
| P    | 1.463529732095  | 0.963306089884  | 0.669213631253  |
| N    | -1.331029730382 | -0.666331468610 | 1.076356816417  |
| N    | -1.088626589146 | 0.657271345253  | -1.251933585145 |
| C    | -1.412850098944 | -1.317061576731 | 2.230258522290  |
| C    | -0.929301555725 | 1.312026840731  | -2.396020523751 |
| C    | -2.457202682978 | -1.141199199532 | 3.163106560183  |
| C    | -1.828394048875 | 2.287657040458  | -2.877208134746 |
| C    | -3.496011403110 | -0.218208817693 | 2.867734228448  |
| C    | -2.982359976680 | 2.598755677090  | -2.109925159593 |
| C    | -3.451418465289 | 0.476542830132  | 1.688374473897  |
| C    | -3.185480210087 | 1.948407384538  | -0.921565814796 |
| C    | -2.354210612923 | 0.273322225817  | 0.755653471940  |

|   |                 |                 |                 |
|---|-----------------|-----------------|-----------------|
| C | -2.230397763668 | 0.957052582040  | -0.452646738822 |
| H | -0.612262762083 | -2.025562733308 | 2.446062458625  |
| H | -0.043722022373 | 1.061535883506  | -2.981124492819 |
| H | -2.446308317964 | -1.717983463804 | 4.086889033344  |
| H | -1.620915770470 | 2.777887905095  | -3.827411087748 |
| H | -4.315864232861 | -0.066313683377 | 3.570325005062  |
| H | -3.695423264731 | 3.344324901363  | -2.462870838669 |
| H | -4.235152453418 | 1.188691110086  | 1.440117077862  |
| H | -4.062878870793 | 2.168955734168  | -0.317773200516 |
| O | 2.796389427474  | 0.703947629841  | 1.605487080128  |
| C | 3.996235057486  | 0.109307227878  | 1.061880784432  |
| H | 4.756346460506  | 0.192931167775  | 1.848608811507  |
| H | 4.334027878659  | 0.648930507414  | 0.164239873824  |
| H | 3.832807510407  | -0.952052848628 | 0.822539214908  |
| O | 1.963203548004  | 2.026016535418  | -0.480850584918 |
| C | 2.674212415007  | 3.254675426038  | -0.189166078039 |
| H | 3.328449648996  | 3.138103109238  | 0.686645203691  |
| H | 1.952401154317  | 4.066669379360  | -0.018691243425 |
| H | 3.282538352065  | 3.480581734218  | -1.074380934144 |
| O | 0.528916430680  | 1.752179848168  | 1.750961337931  |
| C | 0.997241332034  | 2.664064374925  | 2.778190814316  |
| H | 1.908870063018  | 2.279256761331  | 3.253339780031  |
| H | 0.185918470982  | 2.726743256050  | 3.514007636707  |

|   |                 |                 |                 |
|---|-----------------|-----------------|-----------------|
| H | 1.181477492956  | 3.658379248575  | 2.346950936010  |
| C | -0.826622023433 | -2.302581924244 | -1.348616763734 |
| O | -1.430201885729 | -3.123182666148 | -1.884537377101 |
| C | 1.536965037850  | -0.904814998605 | -1.899177002413 |
| O | 2.290072830242  | -0.899668647651 | -2.778474197190 |
| C | 1.276977835532  | -2.266119043460 | 0.483371445508  |
| O | 1.868794805148  | -3.089636997184 | 1.043099265857  |

---

### Mechanism of the Photochemical Ligand Substitution (PLS) Reaction

Table S9. Cartesian coordinates (in Å) of the  $T_1$  state equilibrium structure ( $T_1$ -min(global)) of *fac*-[Re<sup>I</sup>(bpy)(CO)<sub>3</sub>P(OMe)<sub>3</sub>]<sup>+</sup>. The electronic energy of the  $T_1$  state is -1600.525274 hartree. This data has been optimized by the UB3LYP calculation.

| Atom | <i>x</i>        | <i>y</i>        | <i>z</i>        |
|------|-----------------|-----------------|-----------------|
| Re   | 0.230718000000  | -0.970103000000 | -0.150747000000 |
| N    | -1.332120000000 | -0.304840000000 | 1.230394000000  |
| N    | -1.126412000000 | 0.214800000000  | -1.394782000000 |
| C    | -1.407567000000 | -0.572921000000 | 2.531539000000  |
| C    | -0.998638000000 | 0.460284000000  | -2.696836000000 |
| C    | -2.442307000000 | -0.121725000000 | 3.368990000000  |
| C    | -1.912021000000 | 1.220415000000  | -3.446813000000 |

|   |                 |                 |                 |
|---|-----------------|-----------------|-----------------|
| C | -3.483010000000 | 0.670891000000  | 2.813610000000  |
| C | -3.050265000000 | 1.769771000000  | -2.796559000000 |
| C | -3.447341000000 | 0.971197000000  | 1.480726000000  |
| C | -3.222549000000 | 1.543866000000  | -1.459635000000 |
| C | -2.360646000000 | 0.488328000000  | 0.644883000000  |
| C | -2.256155000000 | 0.754700000000  | -0.714259000000 |
| H | -0.604681000000 | -1.182276000000 | 2.947923000000  |
| H | -0.123336000000 | 0.032924000000  | -3.186681000000 |
| H | -2.426141000000 | -0.388704000000 | 4.424826000000  |
| H | -1.730378000000 | 1.371996000000  | -4.510000000000 |
| H | -4.297255000000 | 1.032313000000  | 3.442285000000  |
| H | -3.774533000000 | 2.361415000000  | -3.357115000000 |
| H | -4.233599000000 | 1.575697000000  | 1.033787000000  |
| H | -4.086833000000 | 1.952999000000  | -0.941261000000 |
| C | 1.516249000000  | -1.427787000000 | -1.552083000000 |
| O | 2.256002000000  | -1.695567000000 | -2.401125000000 |
| C | 1.313293000000  | -1.950112000000 | 1.150321000000  |
| O | 1.933091000000  | -2.529856000000 | 1.937406000000  |
| P | 1.451232000000  | 1.144033000000  | 0.339009000000  |
| O | 2.944331000000  | 1.109326000000  | 1.040020000000  |
| C | 4.055127000000  | 0.440761000000  | 0.402745000000  |
| H | 4.925599000000  | 0.622874000000  | 1.045060000000  |
| H | 4.242892000000  | 0.854855000000  | -0.599526000000 |

|   |                 |                 |                 |
|---|-----------------|-----------------|-----------------|
| H | 3.873603000000  | -0.642505000000 | 0.332303000000  |
| O | 0.670299000000  | 2.082656000000  | 1.421571000000  |
| C | 1.259147000000  | 3.155856000000  | 2.201650000000  |
| H | 2.242682000000  | 2.859406000000  | 2.588226000000  |
| H | 0.564995000000  | 3.335114000000  | 3.032027000000  |
| H | 1.347531000000  | 4.065839000000  | 1.591142000000  |
| O | 1.660217000000  | 1.993087000000  | -1.051255000000 |
| C | 2.313989000000  | 3.285203000000  | -1.114173000000 |
| H | 3.146635000000  | 3.344884000000  | -0.398558000000 |
| H | 2.698653000000  | 3.389031000000  | -2.136652000000 |
| H | 1.581367000000  | 4.080327000000  | -0.912194000000 |
| O | -0.817267000000 | -2.613051000000 | -0.545710000000 |
| C | -1.410197000000 | -3.571234000000 | -0.775915000000 |

Table S10. Cartesian coordinates (in Å) of the  $T_1$  state transition state in which the axial CO is bent ( $T_1$ -TS(bent)) of *fac*-[Re<sup>I</sup>(bpy)(CO)<sub>3</sub>P(OMe)<sub>3</sub>]<sup>+</sup>. The electronic energy of the  $T_1$  state is -1600.510442 hartree.

| Atom | <i>x</i>        | <i>y</i>        | <i>z</i>        |
|------|-----------------|-----------------|-----------------|
| Re   | 0.247464539744  | -0.717405861911 | -0.323165557290 |
| P    | 1.503002239293  | 1.169999847978  | 0.603137093527  |
| N    | -1.305078842489 | -0.568934178457 | 1.150765083155  |

|   |                 |                 |                 |
|---|-----------------|-----------------|-----------------|
| N | -1.097790715679 | 0.725231642220  | -1.159934697777 |
| C | -1.323724776368 | -1.212607250759 | 2.350457498094  |
| C | -0.911471453636 | 1.393011397203  | -2.332301834224 |
| C | -2.382149807952 | -1.129434251663 | 3.231754941092  |
| C | -1.839199397946 | 2.272325376208  | -2.851199757015 |
| C | -3.502410505930 | -0.347094996800 | 2.875363866356  |
| C | -3.031385523835 | 2.505906562653  | -2.131028311677 |
| C | -3.500222276001 | 0.319337650571  | 1.664707733262  |
| C | -3.239497162975 | 1.837891211440  | -0.939055302302 |
| C | -2.392369061498 | 0.213167116899  | 0.796105951502  |
| C | -2.274592576531 | 0.927626759563  | -0.456069662915 |
| H | -0.445303500818 | -1.813972390536 | 2.582957595318  |
| H | 0.025423748882  | 1.196052554966  | -2.851725146958 |
| H | -2.340132080181 | -1.670699433769 | 4.176484655119  |
| H | -1.638243926842 | 2.768903438754  | -3.800112617574 |
| H | -4.359465934684 | -0.267632419241 | 3.545266415925  |
| H | -3.779232881296 | 3.204787587430  | -2.507779876381 |
| H | -4.355081911412 | 0.929593036445  | 1.378673772620  |
| H | -4.150791333416 | 2.014224981715  | -0.370162289524 |
| O | 2.804317365409  | 0.920791414568  | 1.570437946069  |
| C | 4.011822614309  | 0.285169178889  | 1.085728986920  |
| H | 4.762321096683  | 0.434551106021  | 1.871296463875  |
| H | 4.353648373738  | 0.751320206162  | 0.150148155015  |

|   |                 |                 |                 |
|---|-----------------|-----------------|-----------------|
| H | 3.847604695793  | -0.791629868469 | 0.934002357650  |
| O | 2.032035745432  | 2.100141301752  | -0.631950946368 |
| C | 2.710984030986  | 3.371237338016  | -0.437359599046 |
| H | 3.405115106326  | 3.322413347519  | 0.413596357477  |
| H | 1.967041519251  | 4.165316983387  | -0.281314653582 |
| H | 3.270323880131  | 3.560993093408  | -1.361517193019 |
| O | 0.572223059285  | 2.050843979160  | 1.601675041052  |
| C | 1.043955681763  | 2.974055024920  | 2.622917269894  |
| H | 1.931458601933  | 2.572109295170  | 3.127115995972  |
| H | 0.215232124428  | 3.075598842436  | 3.333949098628  |
| H | 1.267281349512  | 3.949400920628  | 2.168483769590  |
| C | -1.089277017681 | -2.273943562884 | -1.210636246806 |
| O | -1.332717930409 | -3.397872535544 | -1.301839781137 |
| C | 1.520251838403  | -0.871935788711 | -1.833080363277 |
| O | 2.252621499774  | -0.976142276334 | -2.717131136084 |
| C | 1.304751256059  | -2.209361655653 | 0.452192027410  |
| O | 1.903926949378  | -3.097427546220 | 0.875673840058  |

Table S11. Cartesian coordinates (in Å) of the  $T_1$  state equilibrium structure in which the axial CO is bent ( $T_1$ -min(bent)) of *fac*-[Re<sup>I</sup>(bpy)(CO)<sub>3</sub>P(OMe)<sub>3</sub>]<sup>+</sup>. The electronic energy of the  $T_1$  state is -1600.515762 hartree.

| Atom | <i>x</i>        | <i>y</i>        | <i>z</i>        |
|------|-----------------|-----------------|-----------------|
| Re   | 0.260618000000  | -0.817321000000 | -0.329640000000 |
| P    | 1.478658000000  | 1.242649000000  | 0.519746000000  |
| N    | -1.347645000000 | -0.648845000000 | 1.134723000000  |
| N    | -1.117532000000 | 0.747446000000  | -1.121804000000 |
| C    | -1.403532000000 | -1.383835000000 | 2.269786000000  |
| C    | -0.942387000000 | 1.395393000000  | -2.291177000000 |
| C    | -2.433322000000 | -1.263454000000 | 3.194339000000  |
| C    | -1.842436000000 | 2.345223000000  | -2.762850000000 |
| C    | -3.455955000000 | -0.347876000000 | 2.941943000000  |
| C    | -2.969934000000 | 2.638653000000  | -1.994615000000 |
| C    | -3.408342000000 | 0.413177000000  | 1.776477000000  |
| C    | -3.159267000000 | 1.968067000000  | -0.788633000000 |
| C    | -2.344508000000 | 0.251459000000  | 0.883307000000  |
| C    | -2.219324000000 | 1.019549000000  | -0.370342000000 |
| H    | -0.589183000000 | -2.088595000000 | 2.429201000000  |
| H    | -0.048110000000 | 1.139546000000  | -2.857277000000 |
| H    | -2.425061000000 | -1.882079000000 | 4.091333000000  |
| H    | -1.653714000000 | 2.839755000000  | -3.715439000000 |
| H    | -4.283289000000 | -0.225791000000 | 3.642048000000  |
| H    | -3.697825000000 | 3.378770000000  | -2.329154000000 |
| H    | -4.198750000000 | 1.130659000000  | 1.566312000000  |
| H    | -4.036064000000 | 2.181676000000  | -0.181125000000 |



|   |                 |                 |                 |
|---|-----------------|-----------------|-----------------|
| O | 2.777222000000  | 1.112455000000  | 1.525748000000  |
| C | 3.978880000000  | 0.423723000000  | 1.110071000000  |
| H | 4.682839000000  | 0.517984000000  | 1.945889000000  |
| H | 4.406487000000  | 0.889738000000  | 0.209687000000  |
| H | 3.775231000000  | -0.641147000000 | 0.921033000000  |
| O | 1.997605000000  | 2.141544000000  | -0.752107000000 |
| C | 2.630160000000  | 3.440219000000  | -0.604664000000 |
| H | 3.333274000000  | 3.442288000000  | 0.240657000000  |
| H | 1.860595000000  | 4.213148000000  | -0.464605000000 |
| H | 3.174487000000  | 3.624150000000  | -1.539166000000 |
| O | 0.505685000000  | 2.164105000000  | 1.453296000000  |
| C | 0.940243000000  | 3.088871000000  | 2.486806000000  |
| H | 1.653821000000  | 2.601470000000  | 3.163307000000  |
| H | 0.029995000000  | 3.368332000000  | 3.031108000000  |
| H | 1.393807000000  | 3.983772000000  | 2.037683000000  |
| C | -0.957994000000 | -2.077772000000 | -1.600273000000 |
| O | -1.491767000000 | -3.107543000000 | -1.361935000000 |
| C | 1.634762000000  | -0.930218000000 | -1.746926000000 |
| O | 2.429367000000  | -1.013286000000 | -2.577901000000 |
| C | 1.282307000000  | -2.292985000000 | 0.460333000000  |
| O | 1.873713000000  | -3.179894000000 | 0.906090000000  |

---

Table S12. Cartesian coordinates (in Å) of the  $T_1$  state transition state for the axial CO dissociation ( $T_1$ -TS(dissociation)) of *fac*-[Re<sup>I</sup>(bpy)(CO)<sub>3</sub>P(OMe)<sub>3</sub>]<sup>+</sup>. The electronic energy of the  $T_1$  state is -1600.509637 hartree.

| Atom | <i>x</i>        | <i>y</i>        | <i>z</i>        |
|------|-----------------|-----------------|-----------------|
| Re   | 0.293654000000  | -0.583773000000 | -0.229844000000 |
| P    | 1.541949000000  | 1.324133000000  | 0.624716000000  |
| N    | -1.351336000000 | -0.495955000000 | 1.195488000000  |
| N    | -1.147601000000 | 0.737849000000  | -1.147245000000 |
| C    | -1.375500000000 | -1.130951000000 | 2.391626000000  |
| C    | -0.972001000000 | 1.358340000000  | -2.342194000000 |
| C    | -2.462734000000 | -1.073564000000 | 3.251604000000  |
| C    | -1.937280000000 | 2.171576000000  | -2.914173000000 |
| C    | -3.585278000000 | -0.331002000000 | 2.869798000000  |
| C    | -3.143212000000 | 2.369235000000  | -2.231952000000 |
| C    | -3.570467000000 | 0.328308000000  | 1.646029000000  |
| C    | -3.333695000000 | 1.742243000000  | -1.005423000000 |
| C    | -2.441588000000 | 0.237908000000  | 0.819519000000  |
| C    | -2.328579000000 | 0.922987000000  | -0.475188000000 |
| H    | -0.482541000000 | -1.698754000000 | 2.651604000000  |
| H    | -0.018500000000 | 1.185282000000  | -2.837902000000 |
| H    | -2.424722000000 | -1.605621000000 | 4.201970000000  |
| H    | -1.741368000000 | 2.640399000000  | -3.878260000000 |

|   |                 |                 |                 |
|---|-----------------|-----------------|-----------------|
| H | -4.459707000000 | -0.266157000000 | 3.518294000000  |
| H | -3.924086000000 | 3.005201000000  | -2.650456000000 |
| H | -4.433615000000 | 0.913060000000  | 1.334561000000  |
| H | -4.264020000000 | 1.889570000000  | -0.460473000000 |
| O | 2.899087000000  | 1.048986000000  | 1.513593000000  |
| C | 4.023931000000  | 0.322371000000  | 0.966597000000  |
| H | 4.783207000000  | 0.307234000000  | 1.757956000000  |
| H | 4.423517000000  | 0.832809000000  | 0.077564000000  |
| H | 3.735848000000  | -0.708345000000 | 0.711162000000  |
| O | 2.010001000000  | 2.282113000000  | -0.622385000000 |
| C | 2.674203000000  | 3.557811000000  | -0.427598000000 |
| H | 3.466366000000  | 3.477180000000  | 0.330922000000  |
| H | 1.939328000000  | 4.321673000000  | -0.134654000000 |
| H | 3.115803000000  | 3.821486000000  | -1.396466000000 |
| O | 0.706478000000  | 2.239890000000  | 1.689591000000  |
| C | 1.281172000000  | 3.054864000000  | 2.746919000000  |
| H | 1.977848000000  | 2.462055000000  | 3.353359000000  |
| H | 0.430886000000  | 3.382641000000  | 3.357388000000  |
| H | 1.795538000000  | 3.930945000000  | 2.327617000000  |
| C | -1.505995000000 | -2.366212000000 | -1.444620000000 |
| O | -1.274168000000 | -3.372712000000 | -1.937856000000 |
| C | 1.536536000000  | -0.723219000000 | -1.721766000000 |
| O | 2.251941000000  | -0.822719000000 | -2.629989000000 |

|   |                |                 |                |
|---|----------------|-----------------|----------------|
| C | 1.095875000000 | -2.302893000000 | 0.326601000000 |
| O | 1.554148000000 | -3.322118000000 | 0.630259000000 |

---

Table S13. Cartesian coordinates (in Å) of the ground state equilibrium structure ( $S_0$ -min(global) or  $S_2$ -FC) of *fac*-[Re<sup>I</sup>(bpy)(CO)<sub>3</sub>Cl]. The electronic energy of the  $S_0$  state is -1374.213754 hartree.

| Atom | <i>x</i>        | <i>y</i>        | <i>z</i>        |
|------|-----------------|-----------------|-----------------|
| C    | -3.275102535000 | -0.044246517000 | 1.502075308000  |
| C    | -3.196554867000 | -0.052098836000 | 2.892631590000  |
| C    | -2.100549080000 | -0.066124547000 | 0.740178534000  |
| H    | -4.106717658000 | -0.034368719000 | 3.493526714000  |
| C    | -1.939619874000 | -0.083560540000 | 3.496676002000  |
| N    | -0.878232683000 | -0.094185530000 | 1.337308555000  |
| H    | -1.823888852000 | -0.091815265000 | 4.580355943000  |
| C    | -0.810559610000 | -0.103191867000 | 2.683418959000  |
| H    | 0.188924542000  | -0.125931304000 | 3.115733939000  |
| H    | -4.248406741000 | -0.020601489000 | 1.016325273000  |
| C    | -2.100549080000 | -0.066124547000 | -0.740178534000 |
| N    | -0.878232683000 | -0.094185529000 | -1.337308555000 |
| C    | -3.275102535000 | -0.044246517000 | -1.502075308000 |
| C    | -0.810559610000 | -0.103191867000 | -2.683418959000 |
| C    | -3.196554867000 | -0.052098836000 | -2.892631590000 |

|    |                 |                 |                 |
|----|-----------------|-----------------|-----------------|
| C  | -1.939619874000 | -0.083560540000 | -3.496676002000 |
| H  | -4.248406741000 | -0.020601490000 | -1.016325273000 |
| H  | 0.188924542000  | -0.125931304000 | -3.115733938000 |
| H  | -4.106717658000 | -0.034368720000 | -3.493526714000 |
| H  | -1.823888852000 | -0.091815265000 | -4.580355943000 |
| Re | 0.894823041000  | -0.052419202000 | 0.000000000000  |
| C  | 2.265516626000  | 0.103478225000  | 1.361643884000  |
| C  | 1.070050144000  | -1.967896832000 | 0.000000000000  |
| C  | 2.265516626000  | 0.103478225000  | -1.361643884000 |
| Cl | 0.509433047000  | 2.478712142000  | 0.000000000000  |
| O  | 1.176732428000  | -3.127264736000 | 0.000000000000  |
| O  | 3.066716767000  | 0.208111583000  | 2.195547625000  |
| O  | 3.066716767000  | 0.208111583000  | -2.195547625000 |

Table S14. Cartesian coordinates (in Å) of the  $T_1$  state equilibrium structure ( $T_1$ -min(global)) of *fac*-[Re<sup>I</sup>(bpy)(CO)<sub>3</sub>Cl]. The electronic energy of the  $S_0$  state is -1374.122477 hartree.

| Atom | <i>x</i>        | <i>y</i>        | <i>z</i>       |
|------|-----------------|-----------------|----------------|
| C    | -3.261979699881 | -0.193683852314 | 1.519241846673 |
| C    | -3.171379001672 | -0.173719413924 | 2.889293838312 |
| C    | -2.089168922355 | -0.142265004963 | 0.710407834126 |
| H    | -4.074010282039 | -0.212806758594 | 3.501298090862 |

|    |                 |                 |                 |
|----|-----------------|-----------------|-----------------|
| C  | -1.885580403676 | -0.100765655544 | 3.503596678830  |
| N  | -0.830148407328 | -0.074149945120 | 1.333284732265  |
| H  | -1.769928948518 | -0.077502051417 | 4.586752586548  |
| C  | -0.773314869948 | -0.056636596935 | 2.694761760979  |
| H  | 0.226767271955  | 0.000668784909  | 3.125388039455  |
| H  | -4.238498286975 | -0.248352546473 | 1.039511489722  |
| C  | -2.091755847733 | -0.139492169199 | -0.710735334698 |
| N  | -0.839139104513 | -0.069291758951 | -1.334577809418 |
| C  | -3.267938593208 | -0.191940620721 | -1.515782004049 |
| C  | -0.783035549354 | -0.046770969907 | -2.692266356186 |
| C  | -3.179931318751 | -0.166942874662 | -2.886540111053 |
| C  | -1.898143238437 | -0.089257916215 | -3.501781830276 |
| H  | -4.243170058487 | -0.251298115745 | -1.034049261627 |
| H  | 0.216418369120  | 0.013191235073  | -3.124407782564 |
| H  | -4.083950642662 | -0.206183458638 | -3.496605206479 |
| H  | -1.783454481362 | -0.061731886093 | -4.584958084411 |
| Re | 0.848282846012  | -0.001129366743 | 0.005293768255  |
| C  | 2.295221044873  | 0.127792079655  | 1.355454143414  |
| C  | 0.893308506152  | -1.992356681475 | -0.009180864065 |
| C  | 2.325305015188  | 0.091428010644  | -1.332265663507 |
| Cl | 0.644022482415  | 2.454574558330  | -0.052003976742 |
| O  | 0.912866602202  | -3.139526564733 | -0.022503378397 |
| O  | 3.139913663189  | 0.207805771878  | 2.134905249866  |

---

|   |                |                |                 |
|---|----------------|----------------|-----------------|
| O | 3.186079153514 | 0.143371489237 | -2.094366552174 |
|---|----------------|----------------|-----------------|

---

Table S15. Cartesian coordinates (in Å) of the  $T_1$  state transition state in which the axial CO is bent ( $T_1$ -TS(bent)) of *fac*-[Re<sup>I</sup>(bpy)(CO)<sub>3</sub>Cl]. The electronic energy of the  $T_1$  state is -1374.106438 hartree.

---

| Atom | <i>x</i>        | <i>y</i>        | <i>z</i>        |
|------|-----------------|-----------------|-----------------|
| C    | -3.178537973855 | 0.075666504442  | 1.478483457086  |
| C    | -3.040000832813 | 0.124228253791  | 2.858411838810  |
| C    | -2.032413138780 | 0.081158863401  | 0.661389760044  |
| H    | -3.923281432908 | 0.128372567055  | 3.498616949123  |
| C    | -1.752017897587 | 0.163268000404  | 3.413204463040  |
| N    | -0.785056377812 | 0.088321559764  | 1.213650003136  |
| H    | -1.594076971411 | 0.216663584259  | 4.490287581813  |
| C    | -0.660955019648 | 0.126879703591  | 2.557383323016  |
| H    | 0.358274807279  | 0.131106788164  | 2.944063139235  |
| H    | -4.170902913772 | 0.029865469655  | 1.033575902411  |
| C    | -2.083507060430 | 0.048715574697  | -0.801756482303 |
| N    | -0.879460995741 | -0.088990069267 | -1.448009430042 |
| C    | -3.281987430918 | 0.128936639614  | -1.530954882766 |
| C    | -0.877539016307 | -0.185332961148 | -2.801648687957 |
| C    | -3.262009570045 | 0.040286120324  | -2.915751742606 |
| C    | -2.031444524770 | -0.133312368023 | -3.566081687386 |

---

|    |                 |                 |                 |
|----|-----------------|-----------------|-----------------|
| H  | -4.227900650029 | 0.265529365636  | -1.010086368387 |
| H  | 0.097809419925  | -0.301510557411 | -3.272336095575 |
| H  | -4.190465701636 | 0.105936487868  | -3.484491544937 |
| H  | -1.962760322763 | -0.216668923150 | -4.650461270099 |
| Re | 0.923946977453  | -0.053738247197 | -0.235308523309 |
| C  | 2.504437086629  | 0.151662063909  | 0.932206469015  |
| C  | 0.905995994939  | -2.005866646862 | 0.266045710884  |
| C  | 2.238428267357  | 0.027567444115  | -1.680067311750 |
| Cl | 0.710216497992  | 2.541574872040  | -0.040622942210 |
| O  | 1.021248551622  | -3.142339327375 | 0.002168697100  |
| O  | 3.432177631629  | 0.282951900990  | 1.605217663536  |
| O  | 3.028210330062  | 0.049196581540  | -2.530068171928 |

Table S16. Cartesian coordinates (in Å) of the  $T_1$  state equilibrium structure in which the axial CO is bent ( $T_1$ -min(bent)) of *fac*-[Re<sup>I</sup>(bpy)(CO)<sub>3</sub>Cl]. The electronic energy of the  $T_1$  state is -1374.110055 hartree.

| Atom | <i>x</i>        | <i>y</i>        | <i>z</i>       |
|------|-----------------|-----------------|----------------|
| C    | -3.258841722941 | -0.160321848548 | 1.497215817403 |
| C    | -3.169461131953 | -0.218139516848 | 2.886166350055 |
| C    | -2.090705630876 | -0.049410222004 | 0.733515794715 |
| H    | -4.073908582479 | -0.303190865350 | 3.489927574690 |
| C    | -1.910892399510 | -0.167107932831 | 3.486475341920 |



|    |                 |                 |                 |
|----|-----------------|-----------------|-----------------|
| N  | -0.868379693005 | -0.001242184644 | 1.327486500862  |
| H  | -1.790136323941 | -0.209236304334 | 4.568793880640  |
| C  | -0.788560769638 | -0.060868559716 | 2.670640277297  |
| H  | 0.213333996133  | -0.019206813394 | 3.096670327921  |
| H  | -4.233665424198 | -0.203127217306 | 1.015687233498  |
| C  | -2.091737711511 | 0.016084178236  | -0.743335378711 |
| N  | -0.867935179895 | 0.110528278321  | -1.337266012518 |
| C  | -3.262457917146 | -0.017681179223 | -1.509134969987 |
| C  | -0.799314096353 | 0.169067796472  | -2.684538740648 |
| C  | -3.181688505517 | 0.041990656698  | -2.898440667211 |
| C  | -1.925846100801 | 0.135763646457  | -3.499070902625 |
| H  | -4.235120455412 | -0.087804580358 | -1.026678475055 |
| H  | 0.199070223110  | 0.247695314863  | -3.112714123412 |
| H  | -4.089962708212 | 0.015964880261  | -3.501799839776 |
| H  | -1.809875499552 | 0.185734104039  | -4.581492116564 |
| Re | 0.886534171995  | 0.212779857661  | -0.018719036700 |
| C  | 2.368677435062  | 0.310948520176  | 1.256309257634  |
| C  | 0.979456409001  | -1.898319168884 | 0.104015282967  |
| C  | 2.310486413053  | 0.461812631272  | -1.334934273731 |
| Cl | 0.405021796395  | 2.718480520502  | 0.279037937155  |
| O  | 1.241226379965  | -2.685536484006 | -0.751093406043 |
| O  | 3.250664415010  | 0.377710873417  | 2.002646483457  |
| O  | 3.160187644213  | 0.613606818616  | -2.106957643895 |

Table S17. Cartesian coordinates (in Å) of the  $T_1$  state transition state for the axial CO dissociation ( $T_1$ -TS(dissociation)) of *fac*-[Re<sup>I</sup>(bpy)(CO)<sub>3</sub>Cl]. The electronic energy of the  $T_1$  state is -1374.096167 hartree.

| Atom | <i>x</i>        | <i>y</i>        | <i>z</i>        |
|------|-----------------|-----------------|-----------------|
| C    | -3.221361435280 | -0.398751279642 | 1.496117525990  |
| C    | -3.122533166260 | -0.471207484015 | 2.881751155491  |
| C    | -2.077064340678 | -0.143516464316 | 0.728467396650  |
| H    | -4.008572286575 | -0.669924761956 | 3.485969460106  |
| C    | -1.872851739528 | -0.282700693350 | 3.481022327319  |
| N    | -0.855881557728 | 0.028129760002  | 1.319006901619  |
| H    | -1.745001579862 | -0.324907717780 | 4.562618610504  |
| C    | -0.773817437901 | -0.037494143600 | 2.669565657844  |
| H    | 0.217060925408  | 0.115283123250  | 3.095725626907  |
| H    | -4.186735509402 | -0.539460649524 | 1.013657884500  |
| C    | -2.090899701059 | -0.040746651094 | -0.738834130134 |
| N    | -0.879605392158 | 0.206426510298  | -1.323277564677 |
| C    | -3.251153037385 | -0.180017022563 | -1.512237031774 |
| C    | -0.822331379564 | 0.323251644484  | -2.671944653862 |
| C    | -3.178064990138 | -0.063520544164 | -2.896505605795 |
| C    | -1.937453230219 | 0.195538937998  | -3.488271202542 |
| H    | -4.209242481702 | -0.376153546467 | -1.034748047170 |

|    |                 |                 |                 |
|----|-----------------|-----------------|-----------------|
| H  | 0.161617436487  | 0.527857926913  | -3.092503508383 |
| H  | -4.076741922447 | -0.171457656455 | -3.505068150969 |
| H  | -1.829111050738 | 0.298664171952  | -4.567902629477 |
| Re | 0.845138258559  | 0.400479146540  | 0.000198400130  |
| C  | 2.320853535133  | 0.134358906398  | 1.234516337619  |
| C  | 0.677650417426  | -2.840886040507 | -0.266673023381 |
| C  | 2.287822831778  | 0.316565021649  | -1.294757877162 |
| Cl | 0.539960914600  | 2.867361784396  | 0.179171446723  |
| O  | 1.656822407175  | -3.402229577476 | -0.420317779388 |
| O  | 3.213963487340  | -0.068558349062 | 1.955473147146  |
| O  | 3.160131256396  | 0.220734146573  | -2.062235919334 |

### SC-AFIR search for the $T_1/S_0$ MESXs

Table S18. Cartesian coordinates (in Å) of the  $T_1/S_0$ -MESX at 2.939 eV of energy ( $T_1$ : -1374.105735,  $S_0$ : -1374.105735 hartree), of *fac*-[Re<sup>I</sup>(bpy)(CO)<sub>3</sub>Cl].

| Atom | <i>x</i>        | <i>y</i>        | <i>z</i>       |
|------|-----------------|-----------------|----------------|
| C    | -3.293049465328 | -0.061540673370 | 0.959855679907 |
| C    | -3.453139635077 | 0.318189646673  | 2.289646677216 |
| C    | -2.007683460094 | -0.296794711697 | 0.456564991578 |
| H    | -4.450697247284 | 0.501506559300  | 2.691018337582 |
| C    | -2.318570849459 | 0.462966781619  | 3.090775164026 |

|    |                 |                 |                 |
|----|-----------------|-----------------|-----------------|
| N  | -0.905678802327 | -0.166294624967 | 1.250174601134  |
| H  | -2.392400047462 | 0.767245116302  | 4.134932818474  |
| C  | -1.067201835122 | 0.214157953924  | 2.537451438408  |
| H  | -0.143393954508 | 0.334550626046  | 3.106649222546  |
| H  | -4.165118178999 | -0.173754615981 | 0.318867538671  |
| C  | -1.746275061192 | -0.690473608628 | -0.938596479777 |
| N  | -0.432001125008 | -0.889390050854 | -1.267130350205 |
| C  | -2.757713335710 | -0.859736439658 | -1.891539740930 |
| C  | -0.126337950803 | -1.249756601032 | -2.539639760023 |
| C  | -2.432744898241 | -1.237285328525 | -3.191017831870 |
| C  | -1.088505032043 | -1.433447618156 | -3.521122011701 |
| H  | -3.799047198417 | -0.700012035158 | -1.619222068512 |
| H  | 0.930299014182  | -1.393452870606 | -2.757709092535 |
| H  | -3.217733118291 | -1.375972397214 | -3.935307881216 |
| H  | -0.781521410771 | -1.728342608127 | -4.524424388708 |
| Re | 1.036380508966  | -0.667934728905 | 0.328766158659  |
| C  | 1.720654149360  | -1.795930274164 | 1.804781685099  |
| C  | 2.551195307674  | -1.302742726581 | -0.695085042457 |
| C  | 1.729449999796  | 1.179869302206  | 0.060340543956  |
| Cl | 2.287017773507  | 0.985003484717  | 3.002674637285  |
| O  | 3.438346752405  | -1.695260117748 | -1.336231114668 |
| O  | 2.119344436114  | -2.499009893679 | 2.636828554303  |
| O  | 2.166641288802  | 2.221046828148  | -0.182107599492 |

---

Table S19. Cartesian coordinates (in Å) of the  $T_1/S_0$ -MESX at 3.049 eV of energy ( $T_1$ : -1374.101716,  $S_0$ : -1374.101716 hartree), of *fac*-[Re<sup>I</sup>(bpy)(CO)<sub>3</sub>Cl].

| Atom | <i>x</i>        | <i>y</i>        | <i>z</i>        |
|------|-----------------|-----------------|-----------------|
| C    | -3.474651667419 | -0.223042440084 | 1.526141727362  |
| C    | -3.374431602408 | -0.235200364360 | 2.916100547077  |
| C    | -2.314750463505 | -0.159081803020 | 0.748655156624  |
| H    | -4.276056134856 | -0.284771787725 | 3.527985305843  |
| C    | -2.112474475598 | -0.184128168791 | 3.508388931303  |
| N    | -1.083240637495 | -0.110346649969 | 1.335210772156  |
| H    | -1.985375192791 | -0.191484625117 | 4.590429329974  |
| C    | -0.994993690615 | -0.122405344979 | 2.683969640381  |
| H    | 0.009867836707  | -0.078398744486 | 3.101028570547  |
| H    | -4.453610985114 | -0.263477971390 | 1.053375301111  |
| C    | -2.325709625178 | -0.142005507937 | -0.727527021960 |
| N    | -1.103819505725 | -0.094557354806 | -1.319568701459 |
| C    | -3.499808455526 | -0.174334830892 | -1.489168034723 |
| C    | -1.028102786928 | -0.086959356579 | -2.663903740975 |
| C    | -3.414681390249 | -0.160200749684 | -2.879370969170 |
| C    | -2.155415678786 | -0.117100341172 | -3.479256023038 |
| H    | -4.473984200368 | -0.208135211607 | -1.005451249113 |

|    |                 |                 |                 |
|----|-----------------|-----------------|-----------------|
| H  | -0.026494008881 | -0.053423174653 | -3.091014879366 |
| H  | -4.321876749893 | -0.183432472150 | -3.484389145390 |
| H  | -2.037818611854 | -0.106581950708 | -4.562698575478 |
| Re | 0.656239698687  | 0.004546458229  | 0.030399255627  |
| C  | 2.135597388580  | 0.063074346533  | 1.306396460644  |
| C  | 0.733685441891  | -2.048017083635 | -0.419712063145 |
| C  | 2.208560095941  | 0.114697851311  | -1.228673087098 |
| Cl | 0.401599341459  | 2.543495152425  | -0.507798057825 |
| O  | 0.525671243160  | -2.857904719048 | 0.476911087082  |
| O  | 3.030370318417  | 0.091648426729  | 2.039125209279  |
| O  | 3.118877576814  | 0.178258962300  | -1.925149998744 |

Table S20. Cartesian coordinates (in Å) of the  $T_1/S_0$ -MESX at 3.063 eV of energy ( $T_1$ : -1374.101175,  $S_0$ : -1374.101175 hartree), of *fac*-[Re<sup>I</sup>(bpy)(CO)<sub>3</sub>Cl].

| Atom | <i>x</i>        | <i>y</i>        | <i>z</i>       |
|------|-----------------|-----------------|----------------|
| C    | -3.278364052087 | -0.281267017390 | 1.110554223803 |
| C    | -3.426418856079 | -0.274026517025 | 2.496424152331 |
| C    | -1.996837000190 | -0.391999830740 | 0.556581856077 |
| H    | -4.419544271604 | -0.187227820305 | 2.939421890368 |
| C    | -2.292754191338 | -0.380232362926 | 3.303261531011 |
| N    | -0.903653202033 | -0.486619101660 | 1.348576307238 |

|    |                 |                 |                 |
|----|-----------------|-----------------|-----------------|
| H  | -2.360878310248 | -0.384177918348 | 4.391022715433  |
| C  | -1.049288160249 | -0.488077176454 | 2.686199899165  |
| H  | -0.133834340914 | -0.577898876203 | 3.272327461667  |
| H  | -4.154834686868 | -0.193235633578 | 0.471491863039  |
| C  | -1.732055209243 | -0.405928730757 | -0.898896840246 |
| N  | -0.423707816513 | -0.419857592265 | -1.267423556851 |
| C  | -2.759322131062 | -0.406842644116 | -1.850007677749 |
| C  | -0.129040750393 | -0.416625814149 | -2.580411226083 |
| C  | -2.442276382129 | -0.402213597471 | -3.206426375100 |
| C  | -1.099413373519 | -0.402130984612 | -3.579394438164 |
| H  | -3.801332096596 | -0.415469136316 | -1.536483726122 |
| H  | 0.932353959273  | -0.445367129598 | -2.828233742999 |
| H  | -3.234470406361 | -0.400642669827 | -3.956435634029 |
| H  | -0.794720286390 | -0.396897009679 | -4.625990909517 |
| Re | 1.196824345640  | -0.341255505507 | 0.364008533350  |
| C  | 2.559025961411  | -0.238362892532 | 1.747794691679  |
| C  | 1.295136097122  | -2.264792244671 | 0.806094586016  |
| C  | 2.510047443126  | -0.866445512439 | -1.191013649712 |
| Cl | 1.042400010263  | 2.078818409455  | 0.048428451732  |
| O  | 1.390732835445  | -3.373758044574 | 1.108250400642  |
| O  | 3.374833965188  | -0.211981980925 | 2.568739287991  |
| O  | 3.531907531053  | -0.258080291550 | -1.428265388182 |

---

Table S21. Cartesian coordinates (in Å) of the  $T_1/S_0$ -MESX at 3.114 eV of energy ( $T_1$ : -1374.099318,  $S_0$ : -1374.099318 hartree), of *fac*-[Re<sup>I</sup>(bpy)(CO)<sub>3</sub>Cl].

| Atom | <i>x</i>        | <i>y</i>        | <i>z</i>        |
|------|-----------------|-----------------|-----------------|
| C    | -2.616322357484 | 0.220998503726  | 2.096579059075  |
| C    | -2.273342588270 | -0.003868410416 | 3.429793787898  |
| C    | -1.769600457014 | -0.265714549106 | 1.087265605933  |
| H    | -2.913394283582 | 0.370051216715  | 4.230829255013  |
| C    | -1.101521445304 | -0.705358312832 | 3.721546767036  |
| N    | -0.628838447508 | -0.915533221432 | 1.375993892008  |
| H    | -0.801526421136 | -0.911207010544 | 4.749808213640  |
| C    | -0.305004763657 | -1.130916188934 | 2.656856799287  |
| H    | 0.634961518362  | -1.660994234100 | 2.834080767067  |
| H    | -3.516499975915 | 0.782445500607  | 1.847707020474  |
| C    | -2.105215375806 | -0.121896511130 | -0.354753041154 |
| N    | -1.096920670333 | -0.060778212020 | -1.269472119869 |
| C    | -3.449330573797 | -0.102111097065 | -0.753824089996 |
| C    | -1.433885636828 | 0.003540128118  | -2.578124814738 |
| C    | -3.780316413109 | -0.026834699525 | -2.103646606930 |
| C    | -2.746589087243 | 0.021825165228  | -3.037109441850 |
| H    | -4.233406109398 | -0.178152252373 | -0.001896698896 |
| H    | -0.602486464175 | 0.053118628744  | -3.279161518675 |



|    |                 |                 |                 |
|----|-----------------|-----------------|-----------------|
| H  | -4.825357637545 | -0.022156550210 | -2.417277363639 |
| H  | -2.940088305961 | 0.070161629241  | -4.108736402673 |
| Re | 1.152580408793  | -0.121965290494 | -0.845954119415 |
| C  | 1.325787814310  | 1.064970339696  | 0.727353221940  |
| C  | 1.161490951369  | -2.077873236880 | -0.632211082305 |
| C  | 3.082436905293  | -0.238071270843 | -0.764744979471 |
| Cl | 1.389690786836  | 1.665864377212  | -2.594493653292 |
| O  | 1.185747261007  | -3.219106400496 | -0.408868167017 |
| O  | 1.512699075259  | 1.647518528815  | 1.711681935094  |
| O  | 4.240178433575  | -0.308363042779 | -0.735034294335 |

Table S22. Cartesian coordinates (in Å) of the  $T_1/S_0$ -MESX at 3.230 eV of energy ( $T_1$ : -1374.095056,  $S_0$ : -1374.095056 hartree), of *fac*-[Re<sup>I</sup>(bpy)(CO)<sub>3</sub>Cl].

| Atom | <i>x</i>        | <i>y</i>        | <i>z</i>       |
|------|-----------------|-----------------|----------------|
| C    | -2.954674657331 | -0.573093227335 | 1.078983130443 |
| C    | -2.953375396295 | -0.697171300350 | 2.466899325107 |
| C    | -1.785456649781 | -0.159773232730 | 0.424034544517 |
| H    | -3.857442090093 | -1.017022691887 | 2.987134447711 |
| C    | -1.786094934174 | -0.408767810420 | 3.175422499544 |
| N    | -0.660620145752 | 0.116947980481  | 1.121161594067 |
| H    | -1.739724667807 | -0.492237392244 | 4.261327661171 |

|    |                 |                 |                 |
|----|-----------------|-----------------|-----------------|
| C  | -0.661380107842 | -0.006815921890 | 2.458446858587  |
| H  | 0.275788168063  | 0.230042627466  | 2.964882964560  |
| H  | -3.861210489143 | -0.796083337833 | 0.519985750872  |
| C  | -1.698194744018 | 0.001179366016  | -1.048407494279 |
| N  | -0.505054029260 | 0.419216009248  | -1.556618372957 |
| C  | -2.785009855811 | -0.264945718311 | -1.891324961376 |
| C  | -0.388300702299 | 0.569662429007  | -2.892557467062 |
| C  | -2.653952167101 | -0.105552028744 | -3.268206405179 |
| C  | -1.429125783217 | 0.318913741378  | -3.780770163138 |
| H  | -3.734170956880 | -0.596991901192 | -1.476493961936 |
| H  | 0.583335208981  | 0.899698732698  | -3.256429487110 |
| H  | -3.498287253066 | -0.311179091678 | -3.927542212659 |
| H  | -1.270145702930 | 0.458444298556  | -4.849911465187 |
| Re | 1.207659921047  | 0.893450102078  | -0.167258853100 |
| C  | 2.674655427387  | 1.376203894474  | 0.996400347190  |
| C  | 1.820634101822  | -0.957818435842 | 0.167528663899  |
| C  | 2.425568373585  | 1.637535908948  | -1.698659734119 |
| Cl | 0.123481820942  | 3.062697775157  | 0.250669275530  |
| O  | 2.204013373797  | -2.019524339548 | 0.396703618469  |
| O  | 3.556969350684  | 1.670371468266  | 1.689110199211  |
| O  | 2.965353402712  | 0.788905205459  | -2.384949035532 |

---

Table S23. Cartesian coordinates (in Å) of the  $T_1/S_0$ -MESX at 3.402 eV of energy ( $T_1$ : -1374.088721,  $S_0$ : -1374.088721 hartree), of *fac*-[Re<sup>I</sup>(bpy)(CO)<sub>3</sub>Cl].

| Atom | <i>x</i>        | <i>y</i>        | <i>z</i>        |
|------|-----------------|-----------------|-----------------|
| C    | -3.380224598257 | -0.357331739903 | 1.584467946686  |
| C    | -3.293365210984 | -0.406050337244 | 2.973706188462  |
| C    | -2.229378003738 | -0.129679124541 | 0.822691714339  |
| H    | -4.186911445891 | -0.584054535716 | 3.573207683476  |
| C    | -2.048069312324 | -0.224351269891 | 3.578795055974  |
| N    | -1.012319246990 | 0.047995588627  | 1.420644326809  |
| H    | -1.928010302835 | -0.251816379336 | 4.661632923113  |
| C    | -0.939421198969 | -0.001978100781 | 2.772104924650  |
| H    | 0.048219495202  | 0.146426999682  | 3.205403897956  |
| H    | -4.342326998599 | -0.500349072773 | 1.096572030953  |
| C    | -2.237812762909 | -0.063948182122 | -0.652521975066 |
| N    | -1.022090498481 | 0.102317339093  | -1.239167133851 |
| C    | -3.404267191268 | -0.153696668661 | -1.421977136867 |
| C    | -0.948155267387 | 0.189669883748  | -2.582374226657 |
| C    | -3.319409330623 | -0.074020644149 | -2.809894652684 |
| C    | -2.068064363073 | 0.101642634811  | -3.402917146531 |
| H    | -4.373605287799 | -0.280024295812 | -0.943985394779 |
| H    | 0.047814007342  | 0.334756549471  | -2.999544492650 |
| H    | -4.221814578325 | -0.144296125244 | -3.418569866569 |

|    |                 |                 |                 |
|----|-----------------|-----------------|-----------------|
| H  | -1.951838145969 | 0.172991281069  | -4.484190244446 |
| Re | 0.721270948815  | 0.273845707394  | 0.112759051413  |
| C  | 2.053162591331  | 0.629473368479  | 1.469390674624  |
| C  | 1.251055752617  | -1.662004690088 | -0.022862809352 |
| C  | 2.114500852246  | -0.565839459147 | -1.101115663242 |
| Cl | 0.795862354693  | 2.640229995180  | -0.671784155535 |
| O  | 1.316190344514  | -2.840564958999 | 0.134083160887  |
| O  | 2.827787474828  | 0.874562327890  | 2.300135171216  |
| O  | 2.953688265042  | -0.767453394714 | -1.920144168653 |

Table S24. Cartesian coordinates (in Å) of the  $T_1/S_0$ -MESX at 3.735 eV of energy ( $T_1$ : -1374.076475,  $S_0$ : -1374.076475 hartree), of *fac*-[Re<sup>I</sup>(bpy)(CO)<sub>3</sub>Cl].

| Atom | <i>x</i>        | <i>y</i>        | <i>z</i>       |
|------|-----------------|-----------------|----------------|
| C    | -3.189203696215 | -0.234191407928 | 1.565729188240 |
| C    | -3.180461126583 | -0.042463653951 | 2.933588971894 |
| C    | -1.995884776582 | -0.062709515403 | 0.815531489569 |
| H    | -4.097331391454 | -0.183669179105 | 3.509091480904 |
| C    | -1.980811441347 | 0.316963941762  | 3.580399488922 |
| N    | -0.830955185314 | 0.281131586632  | 1.467123624801 |
| H    | -1.932198137199 | 0.473461116400  | 4.657412994374 |
| C    | -0.841140653201 | 0.460539225152  | 2.806846256707 |

|    |                 |                 |                 |
|----|-----------------|-----------------|-----------------|
| H  | 0.112899345415  | 0.737862040492  | 3.256389173113  |
| H  | -4.103734168556 | -0.539996153699 | 1.059235184968  |
| C  | -1.920760339707 | -0.209943727131 | -0.609430912709 |
| N  | -0.594926778552 | -0.321380733067 | -1.183678320151 |
| C  | -3.025556461438 | -0.130203294241 | -1.476449647398 |
| C  | -0.482354775682 | -0.288208020905 | -2.597909356757 |
| C  | -2.890208962394 | -0.131962998733 | -2.852357049665 |
| C  | -1.564709977139 | -0.205055336360 | -3.408907565835 |
| H  | -4.015440378812 | -0.017763655063 | -1.031594487372 |
| H  | 0.534347511443  | -0.369991748610 | -2.979591898226 |
| H  | -3.762401948051 | -0.051129895044 | -3.499932741501 |
| H  | -1.410203764625 | -0.199189565421 | -4.488962782812 |
| Re | 0.953444478774  | 0.448808153222  | 0.168353569822  |
| C  | 2.284814780511  | -0.280508667378 | 1.430601319247  |
| C  | 0.538819079388  | -1.427795323791 | -0.389768258275 |
| C  | 2.368601091464  | 0.715807598946  | -1.149511716787 |
| Cl | 1.227323399027  | 2.733328020949  | 1.037582725920  |
| O  | 0.459761178562  | -2.589449223926 | -0.542236743966 |
| O  | 3.033662471639  | -0.781274913937 | 2.141378841238  |
| O  | 3.197517246343  | 0.887755610926  | -1.935161829791 |

---

Table S25. Cartesian coordinates (in Å) of the  $T_1/S_0$ -MESX at 3.779 eV of energy ( $T_1$ : -1374.074867,  $S_0$ : -1374.074867 hartree), of *fac*-[Re<sup>I</sup>(bpy)(CO)<sub>3</sub>Cl].

| Atom | $x$             | $y$             | $z$             |
|------|-----------------|-----------------|-----------------|
| C    | -3.157170096025 | -0.147284245067 | 1.599162082908  |
| C    | -3.156874531486 | 0.044170648568  | 2.965954663071  |
| C    | -1.952503009619 | -0.009137294111 | 0.856398688544  |
| H    | -4.084916890603 | -0.064072596649 | 3.530475327023  |
| C    | -1.954808426830 | 0.373652376733  | 3.624866093642  |
| N    | -0.783405149268 | 0.289264567688  | 1.523896174113  |
| H    | -1.913829670993 | 0.537133776078  | 4.701099328469  |
| C    | -0.803680593820 | 0.476207166289  | 2.862622050014  |
| H    | 0.155115045759  | 0.720478643451  | 3.322992635892  |
| H    | -4.080827426630 | -0.409737714151 | 1.085807694443  |
| C    | -1.872164742792 | -0.155602868733 | -0.565997607856 |
| N    | -0.546936074076 | -0.120419001060 | -1.147496732316 |
| C    | -2.975624172789 | -0.304901554584 | -1.429670980852 |
| C    | -0.447354569266 | 0.000328036068  | -2.559397756752 |
| C    | -2.840682386239 | -0.309248587205 | -2.803689147386 |
| C    | -1.530149715569 | -0.111128545873 | -3.365108031999 |
| H    | -3.969827236766 | -0.379724576042 | -0.988290281891 |
| H    | 0.560884209458  | 0.148107565673  | -2.942073756502 |
| H    | -3.710713290895 | -0.419220908385 | -3.449835640668 |
| H    | -1.390424612440 | -0.030769561951 | -4.444156434759 |
| Re   | 1.026371002343  | 0.405333644522  | 0.267888515485  |

|    |                |                 |                 |
|----|----------------|-----------------|-----------------|
| C  | 2.224484520521 | -0.648257492011 | 1.450796488036  |
| C  | 0.503240052562 | -1.347157746673 | -0.491570741606 |
| C  | 2.484567598784 | 0.658821935649  | -1.008213701643 |
| Cl | 0.503747993141 | 2.797883409434  | 0.137604894722  |
| O  | 0.396658808309 | -2.489154478284 | -0.758688134491 |
| O  | 2.883033213028 | -1.342132231697 | 2.087458420082  |
| O  | 3.326696771889 | 0.825337913119  | -1.779063109228 |

Table S26. Cartesian coordinates (in Å) of the  $T_1/S_0$ -MESX at 3.896 eV of energy ( $T_1$ : -1374.070564,  $S_0$ : -1374.070564 hartree), of *fac*-[Re<sup>I</sup>(bpy)(CO)<sub>3</sub>Cl].

| Atom | <i>x</i>        | <i>y</i>        | <i>z</i>       |
|------|-----------------|-----------------|----------------|
| C    | -3.231470059707 | -0.355116097621 | 1.091706316038 |
| C    | -3.292113142068 | 0.285852675481  | 2.320723174358 |
| C    | -1.977307098155 | -0.544809828944 | 0.468939858518 |
| H    | -4.255175636461 | 0.459714545756  | 2.803807999570 |
| C    | -2.101983184857 | 0.701281710595  | 2.934195258932 |
| N    | -0.808781796376 | -0.160226948123 | 1.095324254400 |
| H    | -2.101707055592 | 1.194558345826  | 3.906003273651 |
| C    | -0.891188106529 | 0.448846117539  | 2.288935436613 |
| H    | 0.054681713459  | 0.735560003616  | 2.749939664925 |
| H    | -4.134699447985 | -0.707812027860 | 0.593153763040 |

|    |                 |                 |                 |
|----|-----------------|-----------------|-----------------|
| C  | -1.768436763974 | -1.271424690850 | -0.747659454153 |
| N  | -0.526470458641 | -0.831827435450 | -1.433508337173 |
| C  | -2.839249365298 | -1.765534005098 | -1.652050678699 |
| C  | -0.863149728493 | 0.022022199970  | -2.354318796766 |
| C  | -3.218322545668 | -0.810120392209 | -2.580041292799 |
| C  | -2.244043476546 | 0.181075723254  | -2.838775739439 |
| H  | -3.133492069520 | -2.816435866122 | -1.715230912315 |
| H  | -0.073844190619 | 0.621219383464  | -2.816902838717 |
| H  | -4.072148414928 | -0.923590682575 | -3.253687118393 |
| H  | -2.415104626399 | 0.949778472549  | -3.594377806371 |
| Re | 1.115585333102  | -0.728720219320 | 0.022000186402  |
| C  | 2.326953751983  | -0.417062162393 | 1.504295418487  |
| C  | 0.940363303950  | -2.579673163587 | 0.518712994109  |
| C  | 2.614548892458  | -1.139286692565 | -1.129107377492 |
| Cl | 1.241830426348  | 1.758678956933  | -0.574649462862 |
| O  | 0.852831311451  | -3.697578629088 | 0.833348933537  |
| O  | 3.044019625943  | -0.215013194906 | 2.394280298495  |
| O  | 3.498929250510  | -1.371214009024 | -1.844568390215 |

---

Table S27. Cartesian coordinates (in Å) of the  $T_1/S_0$ -MESX at 4.209 eV of energy ( $T_1$ : -1374.059056,  $S_0$ : -1374.059056 hartree), of *fac*-[Re<sup>I</sup>(bpy)(CO)<sub>3</sub>Cl].



| Atom | <i>x</i>        | <i>y</i>        | <i>z</i>        |
|------|-----------------|-----------------|-----------------|
| C    | -2.502876834091 | 0.253535286519  | 2.042104531577  |
| C    | -2.164926365443 | 0.009518995653  | 3.361607481331  |
| C    | -1.645066613899 | -0.097887473159 | 0.977952726939  |
| H    | -2.840255936138 | 0.290752322469  | 4.169515152912  |
| C    | -0.928117049545 | -0.671117413687 | 3.644231164653  |
| N    | -0.299527402710 | -0.503242834955 | 1.304687611715  |
| H    | -0.699312138945 | -1.017318922510 | 4.653782187398  |
| C    | -0.050950232259 | -0.918623943469 | 2.642743414635  |
| H    | 0.910462385486  | -1.411577900880 | 2.796680238707  |
| H    | -3.472075392140 | 0.699718279453  | 1.814924376205  |
| C    | -2.054318391132 | -0.092928391763 | -0.406417913097 |
| N    | -1.107831592651 | -0.171297790135 | -1.404929480173 |
| C    | -3.426999472952 | -0.003380532218 | -0.765972635734 |
| C    | -1.510140064316 | -0.154888307255 | -2.698808692216 |
| C    | -3.813839794522 | 0.015286249200  | -2.092078254007 |
| C    | -2.833356278089 | -0.063619786441 | -3.095523882353 |
| H    | -4.183338524080 | 0.013545457262  | 0.016137068247  |
| H    | -0.718182798668 | -0.221302460947 | -3.446793214180 |
| H    | -4.872862880663 | 0.070461299510  | -2.351222808642 |
| H    | -3.085716165311 | -0.063902519026 | -4.155335656151 |
| Re   | 1.086292438530  | -0.215506515704 | -0.993421022812 |
| C    | 0.793955250347  | 0.512523616337  | 0.845647727916  |

|    |                |                 |                 |
|----|----------------|-----------------|-----------------|
| C  | 1.196533709135 | -2.162227777236 | -0.562972255281 |
| C  | 3.000970110055 | -0.188949838657 | -0.588944636683 |
| Cl | 1.167773817946 | 1.978815084662  | -2.057201920260 |
| O  | 1.308752686233 | -3.280009565102 | -0.323482520275 |
| O  | 1.170246961778 | 1.395655990138  | 1.564607976502  |
| O  | 4.120632708990 | -0.172437081089 | -0.307328836723 |

Table S28. Cartesian coordinates (in Å) of the  $T_1/S_0$ -MESX at 4.327 eV of energy ( $T_1$ : -1374.054738,  $S_0$ : -1374.054738 hartree), of *fac*-[Re<sup>I</sup>(bpy)(CO)<sub>3</sub>Cl].

| Atom | <i>x</i>        | <i>y</i>        | <i>z</i>        |
|------|-----------------|-----------------|-----------------|
| C    | -3.096468846171 | -1.005964292586 | 1.614816218852  |
| C    | -3.071874842610 | -0.805588878696 | 2.986318392519  |
| C    | -1.944665977089 | -0.480467568945 | 0.866327849710  |
| H    | -3.823476374572 | -1.192149927752 | 3.672263821405  |
| C    | -1.996406207344 | -0.000418116757 | 3.370560177468  |
| N    | -0.632456073898 | -0.642522561805 | 1.396086819780  |
| H    | -1.872301679021 | 0.425943292388  | 4.368116993036  |
| C    | -1.016852814277 | 0.307482355038  | 2.340361056240  |
| H    | -0.427958955871 | 1.232401145728  | 2.382200922939  |
| H    | -3.902948626844 | -1.521500330796 | 1.090592010347  |
| C    | -2.019941510747 | -0.049397882242 | -0.521962436397 |

|    |                 |                 |                 |
|----|-----------------|-----------------|-----------------|
| N  | -0.829389377065 | 0.006246742735  | -1.195912279382 |
| C  | -3.235060084221 | 0.258107750427  | -1.158082614501 |
| C  | -0.842267090362 | 0.374216416970  | -2.490406054378 |
| C  | -3.231335005356 | 0.629705833328  | -2.498497086718 |
| C  | -2.012025520354 | 0.690840990996  | -3.178641781913 |
| H  | -4.166763043132 | 0.217612552126  | -0.594402192126 |
| H  | 0.124935967425  | 0.409244982799  | -2.991204046286 |
| H  | -4.166307528479 | 0.874389342000  | -3.004679673249 |
| H  | -1.956675205072 | 0.978830640004  | -4.228348300008 |
| Re | 1.000955247208  | -0.536446237572 | -0.025665450360 |
| C  | 2.420767581060  | -0.918019299335 | 1.238218051831  |
| C  | 0.823987376745  | -2.404347510503 | -0.447247120596 |
| C  | 2.312067929728  | -0.307551223057 | -1.448978309591 |
| Cl | 1.142852382053  | 1.982554090204  | 0.469454213034  |
| O  | 0.721743922507  | -3.534071690279 | -0.710237073746 |
| O  | 3.248905548712  | -1.135180097990 | 2.021959449848  |
| O  | 3.078139095487  | -0.148383798013 | -2.306190828558 |

Table S29. Cartesian coordinates (in Å) of the  $T_1/S_0$ -MESX at 3.304 eV of energy ( $T_1$ : -1600.506621,  $S_0$ : -1600.506622 hartree), of *fac*-[Re<sup>I</sup>(bpy)(CO)<sub>3</sub>P(OMe)<sub>3</sub>]<sup>+</sup>.

| Atom | <i>x</i> | <i>y</i> | <i>z</i> |
|------|----------|----------|----------|
|------|----------|----------|----------|

---

|    |                 |                 |                 |
|----|-----------------|-----------------|-----------------|
| Re | -0.200629395287 | -1.385017374091 | -1.118220097061 |
| P  | 1.856959130269  | 0.934274487478  | 2.143459219662  |
| N  | -1.331339948963 | -0.790055551289 | 0.597620085748  |
| N  | -1.229944892009 | 0.426204135112  | -1.764976835306 |
| C  | -1.341584990334 | -1.474885596457 | 1.777420963183  |
| C  | -1.116777860794 | 0.969634032140  | -3.004578495315 |
| C  | -2.087948915722 | -1.050834786640 | 2.869601699513  |
| C  | -1.783998916300 | 2.139041749438  | -3.357699954523 |
| C  | -2.853062151374 | 0.114821664861  | 2.757400543830  |
| C  | -2.592742579424 | 2.770356585985  | -2.407189216851 |
| C  | -2.849172700814 | 0.818646902137  | 1.552015344204  |
| C  | -2.711462105067 | 2.212734004308  | -1.133170781145 |
| C  | -2.082388983042 | 0.360657287968  | 0.476847848481  |
| C  | -2.021352970091 | 1.034451711614  | -0.825959937000 |
| H  | -0.740930968664 | -2.369963836319 | 1.825403495684  |
| H  | -0.482462081902 | 0.448387687833  | -3.708097378585 |
| H  | -2.064834799007 | -1.625645860757 | 3.785855491677  |
| H  | -1.668561220342 | 2.540541402256  | -4.355825908526 |
| H  | -3.443410333975 | 0.470961036623  | 3.592185416547  |
| H  | -3.124566577678 | 3.681312653215  | -2.652463175472 |
| H  | -3.440310589032 | 1.718251824864  | 1.454847777547  |
| H  | -3.335614511422 | 2.693172950525  | -0.392804467179 |
| O  | 3.364305717957  | 1.650899240536  | 2.102466041684  |

|   |                 |                 |                 |
|---|-----------------|-----------------|-----------------|
| C | 4.450891294353  | 1.070856451702  | 1.300159604032  |
| H | 5.352362811636  | 1.624902607002  | 1.558557963086  |
| H | 4.241311994722  | 1.181786878158  | 0.232827462684  |
| H | 4.587790275302  | 0.011722583077  | 1.540727742939  |
| O | 1.174374832764  | 1.532993199875  | 0.752694717296  |
| C | 1.268781286904  | 2.912233863955  | 0.230404947406  |
| H | 2.242857355729  | 3.344265975789  | 0.467755821620  |
| H | 0.467959204459  | 3.517942467280  | 0.660607129335  |
| H | 1.141367646631  | 2.844914956388  | -0.849439831924 |
| O | 1.240810299154  | 1.835132439968  | 3.367140498334  |
| C | 1.546975253474  | 3.232118660812  | 3.735512548718  |
| H | 2.624015897094  | 3.399167479685  | 3.708515471308  |
| H | 1.164953919318  | 3.366246074493  | 4.746795334830  |
| H | 1.039847092775  | 3.918822681002  | 3.053798302132  |
| C | -1.134737276645 | -2.568453905801 | -2.394639635558 |
| O | -1.595576200607 | -3.269479267152 | -3.223200176851 |
| C | 1.588948269337  | -0.655067375074 | -1.530819947583 |
| O | 2.647556211246  | -0.266735542910 | -1.876788481479 |
| C | 0.628694896112  | -2.933380323751 | -0.288737826056 |
| O | 1.119860222975  | -3.864178106617 | 0.247543711096  |

---

Table S30. Cartesian coordinates (in Å) of the  $T_1/S_0$ -MESX at 3.339 eV of energy ( $T_1$ :

-1600.505334,  $S_0$ : -1600.505334 hartree), of *fac*-[Re<sup>I</sup>(bpy)(CO)<sub>3</sub>P(OMe)<sub>3</sub>]<sup>+</sup>.

| Atom | <i>x</i>        | <i>y</i>        | <i>z</i>        |
|------|-----------------|-----------------|-----------------|
| Re   | 0.960294677454  | -0.586352461496 | 0.180588684317  |
| P    | 1.963197831015  | 1.334256767488  | 1.304364295139  |
| N    | -0.981350505788 | -0.285277243156 | 1.140725338797  |
| N    | -0.119109340327 | 0.690401686358  | -1.177833177160 |
| C    | -1.336108325879 | -0.826256789874 | 2.336100950824  |
| C    | 0.390308702203  | 1.149303514383  | -2.358368297694 |
| C    | -2.589002068481 | -0.610806740935 | 2.901147976578  |
| C    | -0.339197699784 | 1.970681021232  | -3.207864444096 |
| C    | -3.512795604822 | 0.187817646198  | 2.216874130846  |
| C    | -1.637313885220 | 2.346417105382  | -2.841157080222 |
| C    | -3.151966554535 | 0.748555103063  | 0.991867021917  |
| C    | -2.164993758514 | 1.882114031314  | -1.636143114505 |
| C    | -1.877262526203 | 0.504636381010  | 0.464985569813  |
| C    | -1.400468610860 | 1.049028822049  | -0.811856454512 |
| H    | -0.590559912605 | -1.434670437893 | 2.828944446441  |
| H    | 1.397102523164  | 0.843054534450  | -2.599698986932 |
| H    | -2.831744395394 | -1.062254684876 | 3.854307708408  |
| H    | 0.104460938142  | 2.307883294965  | -4.135563653214 |
| H    | -4.497152515399 | 0.370872745076  | 2.629620486670  |
| H    | -2.228296454718 | 2.988879941672  | -3.481994237749 |

|   |                 |                 |                 |
|---|-----------------|-----------------|-----------------|
| H | -3.857908207441 | 1.367052870674  | 0.455214772800  |
| H | -3.165908377551 | 2.167684551848  | -1.343863069617 |
| O | 2.975185544985  | 1.013269444080  | 2.537089168970  |
| C | 4.195314991919  | 0.178262112038  | 2.456247160985  |
| H | 4.596496946683  | 0.156295602181  | 3.466923531856  |
| H | 4.911406758911  | 0.635434791907  | 1.770962147196  |
| H | 3.937027284795  | -0.830001994104 | 2.127099848350  |
| O | 2.797203472261  | 2.249128020313  | 0.257732360184  |
| C | 3.443407948503  | 3.560180190712  | 0.535956068511  |
| H | 4.036698253739  | 3.501876005537  | 1.449963013829  |
| H | 2.672215340476  | 4.327552969945  | 0.617590058769  |
| H | 4.084001532586  | 3.754873639883  | -0.320897986717 |
| O | 0.901049430486  | 2.279767975177  | 2.062765401148  |
| C | 1.094953333256  | 3.162281550603  | 3.244283699961  |
| H | 1.746265967075  | 2.670610757682  | 3.965783977809  |
| H | 0.099708118840  | 3.313504608896  | 3.656013224842  |
| H | 1.521541546245  | 4.111391077398  | 2.917633957934  |
| C | 1.148850684630  | -2.478060801311 | 0.691384306871  |
| O | 1.274975694705  | -3.614186021112 | 1.014607067607  |
| C | -1.100378819927 | -2.959596586690 | -1.883745927383 |
| O | -1.994412608474 | -2.276378784753 | -2.152902776215 |
| C | 2.537928089281  | -0.799073884542 | -0.892518469151 |
| O | 3.489696376716  | -0.927778433953 | -1.597553013745 |

---

Table S31. Cartesian coordinates (in Å) of the  $T_1/S_0$ -MESX at 3.453 eV of energy ( $T_1$ : -1600.501163,  $S_0$ : -1600.501163 hartree), of *fac*-[Re<sup>I</sup>(bpy)(CO)<sub>3</sub>P(OMe)<sub>3</sub>]<sup>+</sup>.

| Atom | <i>x</i>        | <i>y</i>        | <i>z</i>        |
|------|-----------------|-----------------|-----------------|
| Re   | 0.202041568366  | -0.941901417993 | -0.285824262826 |
| P    | 1.576003688130  | 1.353804814053  | 0.387160744503  |
| N    | -1.427243837593 | -0.795354039186 | 1.135190755509  |
| N    | -1.131683605921 | 0.712886613385  | -1.033929300568 |
| C    | -1.492684463021 | -1.569181696237 | 2.244191002169  |
| C    | -0.961234000110 | 1.370304492718  | -2.197255480988 |
| C    | -2.463290775935 | -1.395819016490 | 3.223192794769  |
| C    | -1.857504184329 | 2.331871595491  | -2.653205531303 |
| C    | -3.410530132384 | -0.387291355652 | 3.049979586455  |
| C    | -2.985606271808 | 2.616013031409  | -1.882557987300 |
| C    | -3.360013123242 | 0.406090272121  | 1.904695600815  |
| C    | -3.176630140233 | 1.928079538268  | -0.686516490579 |
| C    | -2.359213038584 | 0.188095597417  | 0.955727914328  |
| C    | -2.230492762691 | 0.980063906636  | -0.281527158614 |
| H    | -0.737027578708 | -2.347354082939 | 2.337068660549  |
| H    | -0.075757152396 | 1.109112051608  | -2.775420976220 |
| H    | -2.466780469296 | -2.044136508723 | 4.098674405495  |



|   |                 |                 |                 |
|---|-----------------|-----------------|-----------------|
| H | -1.668006550480 | 2.839624608259  | -3.598672792550 |
| H | -4.184882073291 | -0.215278213233 | 3.798650004842  |
| H | -3.714629150358 | 3.358509235057  | -2.209786846990 |
| H | -4.091324258646 | 1.198235481180  | 1.760206926952  |
| H | -4.061575254231 | 2.119814632816  | -0.083162520812 |
| O | 2.785178510690  | 1.287967790579  | 1.512924049053  |
| C | 3.961648581598  | 0.474040661033  | 1.304677663743  |
| H | 4.583096970985  | 0.610668267943  | 2.198624943180  |
| H | 4.518447434196  | 0.805256461377  | 0.414850116637  |
| H | 3.694474753166  | -0.589353208028 | 1.206624939312  |
| O | 2.185645870134  | 2.221501812898  | -0.868989530670 |
| C | 2.819914614673  | 3.518462009710  | -0.710712467508 |
| H | 3.510969289274  | 3.514959192590  | 0.144874127840  |
| H | 2.052544036581  | 4.295245172345  | -0.579096493296 |
| H | 3.377669248785  | 3.702656857439  | -1.637494035831 |
| O | 0.513101237309  | 2.294260282498  | 1.205803780568  |
| C | 0.836984392993  | 3.254782782517  | 2.244962836500  |
| H | 1.625488013302  | 2.864174281745  | 2.900357040641  |
| H | -0.090819944697 | 3.402736359259  | 2.812376841190  |
| H | 1.152771406880  | 4.206883150372  | 1.794092064216  |
| C | -0.810886466869 | -1.884521270332 | -1.878470102578 |
| O | -1.617455656889 | -2.777773243692 | -1.704530549019 |
| C | 1.714158507070  | -1.012980925197 | -1.614825395643 |

|   |                |                 |                 |
|---|----------------|-----------------|-----------------|
| O | 2.570591043873 | -1.096440912292 | -2.372584875203 |
| C | 1.118579761248 | -2.564734273018 | 0.330942192320  |
| O | 1.649775085287 | -3.540801772212 | 0.639999777679  |

Table S32. Cartesian coordinates (in Å) of the  $T_1/S_0$ -MESX at 3.504 eV of energy ( $T_1$ : -1600.499292,  $S_0$ : -1600.499292 hartree), of *fac*-[Re<sup>I</sup>(bpy)(CO)<sub>3</sub>P(OMe)<sub>3</sub>]<sup>+</sup>.

| Atom | <i>x</i>        | <i>y</i>        | <i>z</i>        |
|------|-----------------|-----------------|-----------------|
| Re   | 0.648634173975  | -0.982250847801 | -0.002564219008 |
| P    | 1.912451458815  | 0.933755868601  | 0.920303096901  |
| N    | -1.363504538372 | -0.366786223550 | 1.311721954346  |
| N    | -0.753151074798 | 0.777531214308  | -1.020386438013 |
| C    | -1.624117644330 | -0.999586234698 | 2.477551540152  |
| C    | -0.380323180422 | 1.326277669932  | -2.199617655705 |
| C    | -2.744976164895 | -0.712684903665 | 3.254860172863  |
| C    | -1.103929970519 | 2.344125267737  | -2.817467513247 |
| C    | -3.634272191712 | 0.268939375194  | 2.810761967479  |
| C    | -2.260192441630 | 2.818512778854  | -2.192863792838 |
| C    | -3.370071364736 | 0.923805926809  | 1.608244460029  |
| C    | -2.648721837125 | 2.256341648791  | -0.977258673090 |
| C    | -2.224223386878 | 0.588781004099  | 0.871020461660  |
| C    | -1.878660579216 | 1.231760664745  | -0.406523726483 |

|   |                 |                 |                 |
|---|-----------------|-----------------|-----------------|
| H | -0.913241493599 | -1.750734560444 | 2.790893011238  |
| H | 0.520905204239  | 0.940559605025  | -2.651602737481 |
| H | -2.909116648023 | -1.249187979027 | 4.180600429579  |
| H | -0.762764200126 | 2.748789755768  | -3.761736379579 |
| H | -4.516896221904 | 0.520161157575  | 3.386384954340  |
| H | -2.848512292093 | 3.610215077882  | -2.640650844290 |
| H | -4.052682794300 | 1.683009980493  | 1.253034592515  |
| H | -3.539655801185 | 2.615550239209  | -0.482287402140 |
| O | 3.252606044948  | 0.659741922528  | 1.806838271877  |
| C | 4.446518231206  | -0.078127775522 | 1.335539597408  |
| H | 5.159193902601  | -0.028810906291 | 2.155644359492  |
| H | 4.856444970026  | 0.402935109552  | 0.445447053368  |
| H | 4.187039776496  | -1.117618986969 | 1.124232243039  |
| O | 2.391576586649  | 1.918103766308  | -0.276356752817 |
| C | 3.100820898097  | 3.216045950725  | -0.130860175209 |
| H | 3.855074865958  | 3.150597075256  | 0.655155247603  |
| H | 2.369818314968  | 3.994189385808  | 0.092981426895  |
| H | 3.571488425949  | 3.402495120064  | -1.093552448165 |
| O | 1.056556909796  | 1.787501072135  | 1.979763469838  |
| C | 1.531164385680  | 2.669103433550  | 3.078616474067  |
| H | 2.385392973717  | 2.209523768443  | 3.574336162518  |
| H | 0.687004089373  | 2.759047974792  | 3.758320152350  |
| H | 1.796643587149  | 3.644241003237  | 2.668283588861  |

|   |                 |                 |                 |
|---|-----------------|-----------------|-----------------|
| C | -0.491801539577 | -2.411658585057 | -0.716681426714 |
| O | -1.203747152833 | -3.245809301251 | -1.139961404182 |
| C | 1.624694896787  | -0.872419616091 | -1.724461449368 |
| O | 2.440354757462  | -1.085807301943 | -2.557692166613 |
| C | 1.050457622585  | -2.045309676475 | 1.628866108677  |
| O | 1.679415839332  | -2.816047814128 | 2.283870914286  |

Table S33. Cartesian coordinates (in Å) of the  $T_1/S_0$ -MESX at 3.508 eV of energy ( $T_1$ : -1600.499121,  $S_0$ : -1600.499121 hartree), of *fac*-[Re<sup>I</sup>(bpy)(CO)<sub>3</sub>P(OMe)<sub>3</sub>]<sup>+</sup>.

| Atom | <i>x</i>        | <i>y</i>        | <i>z</i>        |
|------|-----------------|-----------------|-----------------|
| Re   | 0.172286867964  | -0.543241374570 | -0.759104190801 |
| P    | 1.351408027816  | 1.330894480100  | 0.352152806642  |
| N    | -1.381661520131 | -0.392296143203 | 0.809993920645  |
| N    | -1.320808408296 | 0.926856211923  | -1.467079305603 |
| C    | -1.316830639238 | -1.131313844358 | 1.944743561148  |
| C    | -1.201125105350 | 1.552125756510  | -2.664848480503 |
| C    | -2.289872599292 | -1.036924162353 | 2.936526979979  |
| C    | -2.136761046087 | 2.487106390177  | -3.101058688532 |
| C    | -3.361397611471 | -0.157175542215 | 2.750043601954  |
| C    | -3.229808862619 | 2.786516435938  | -2.281240312943 |
| C    | -3.428340227267 | 0.600092149937  | 1.579200638364  |

|   |                 |                 |                 |
|---|-----------------|-----------------|-----------------|
| C | -3.354204171286 | 2.140541156325  | -1.050394851219 |
| C | -2.423128671379 | 0.470226628625  | 0.613872637464  |
| C | -2.387252038195 | 1.209176077281  | -0.655659282606 |
| H | -0.471238388017 | -1.799757584840 | 2.035358656291  |
| H | -0.341416553292 | 1.287175266910  | -3.265053049842 |
| H | -2.205907400945 | -1.642657590091 | 3.829425248710  |
| H | -2.006152997528 | 2.965051003686  | -4.063157075807 |
| H | -4.134629912597 | -0.063190557985 | 3.502557014952  |
| H | -3.973736917781 | 3.508816751180  | -2.593889456076 |
| H | -4.254928560477 | 1.279612603284  | 1.423402678271  |
| H | -4.194405108798 | 2.361429713203  | -0.406436367116 |
| O | 2.393029285844  | 1.061774849629  | 1.584912290473  |
| C | 3.560832675490  | 0.158599469358  | 1.516975658172  |
| H | 4.053441156192  | 0.244859921854  | 2.483146682889  |
| H | 4.236181416369  | 0.475532071851  | 0.719299773882  |
| H | 3.230453628107  | -0.869152114332 | 1.353326129932  |
| O | 2.214755646078  | 2.179462981846  | -0.735688929943 |
| C | 3.003639189189  | 3.410884916871  | -0.477699277116 |
| H | 3.570566695108  | 3.310592447590  | 0.449521940398  |
| H | 2.326024014400  | 4.264790077367  | -0.427536020980 |
| H | 3.677592818021  | 3.512729065313  | -1.325498220741 |
| O | 0.339157602613  | 2.348664962412  | 1.091570623358  |
| C | 0.595929401821  | 3.293453925957  | 2.206211987118  |

|   |                 |                 |                 |
|---|-----------------|-----------------|-----------------|
| H | 1.306123545931  | 2.855097913313  | 2.906584880833  |
| H | -0.369828057813 | 3.452448171132  | 2.681423975999  |
| H | 0.978472310698  | 4.231175195684  | 1.800425864849  |
| C | -0.764922965849 | -2.000728422086 | -1.618730836484 |
| O | -1.339105325137 | -2.889368173621 | -2.158538343120 |
| C | 1.847634427939  | -1.190348299417 | -1.561353083422 |
| O | 2.855489407563  | -1.604646855917 | -2.037613626099 |
| C | 1.638210966695  | -3.957409462138 | 0.667697046069  |
| O | 1.160468156585  | -3.806271095310 | 1.710074381588  |

Table S34. Cartesian coordinates (in Å) of the  $T_1/S_0$ -MESX at 3.524 eV of energy ( $T_1$ : -1600.498537,  $S_0$ : -1600.498537 hartree), of *fac*-[Re<sup>I</sup>(bpy)(CO)<sub>3</sub>P(OMe)<sub>3</sub>]<sup>+</sup>.

| Atom | <i>x</i>        | <i>y</i>        | <i>z</i>        |
|------|-----------------|-----------------|-----------------|
| Re   | -0.025686482829 | -1.297036800831 | -0.624654528829 |
| P    | 1.340758819182  | 0.635546777766  | 0.029226597591  |
| N    | -1.017486377194 | 0.074398178357  | 1.746284229748  |
| N    | -1.856423969191 | -0.046001115687 | -0.975007600719 |
| C    | -0.652219205667 | -0.100481658523 | 3.035302487512  |
| C    | -2.185860627803 | 0.229561184332  | -2.273004624658 |
| C    | -1.585271592006 | -0.146987977137 | 4.073098219535  |
| C    | -3.288737068065 | 0.992714475467  | -2.636940334044 |

|   |                 |                 |                 |
|---|-----------------|-----------------|-----------------|
| C | -2.942942257814 | -0.025526355294 | 3.758476499506  |
| C | -4.107409640561 | 1.514867352307  | -1.633995780322 |
| C | -3.321864968435 | 0.160911682843  | 2.426500135243  |
| C | -3.782294771813 | 1.248641286502  | -0.305316054452 |
| C | -2.329755515182 | 0.219748917989  | 1.434067565992  |
| C | -2.662372090074 | 0.467332135859  | 0.014667096858  |
| H | 0.408515035524  | -0.195403660382 | 3.223534211246  |
| H | -1.538930782216 | -0.177937101255 | -3.033398777434 |
| H | -1.254230696491 | -0.281205706292 | 5.095355553280  |
| H | -3.489569238484 | 1.170187794156  | -3.685444129310 |
| H | -3.696657952946 | -0.079859706442 | 4.534997904980  |
| H | -4.970127542343 | 2.122974812937  | -1.876922149514 |
| H | -4.369403105162 | 0.235953022843  | 2.164992842320  |
| H | -4.379497832704 | 1.669092945094  | 0.492146277500  |
| O | 2.071191176892  | 0.722271324573  | 1.477039676251  |
| C | 3.092699073417  | -0.218737586461 | 1.993751565282  |
| H | 3.447956784012  | 0.224800826100  | 2.921087689468  |
| H | 3.911053352787  | -0.312523901097 | 1.278116851884  |
| H | 2.636598127049  | -1.190746135438 | 2.189655123240  |
| O | 2.524467393195  | 0.725866541065  | -1.075772269962 |
| C | 3.427772905935  | 1.893001688364  | -1.276209434509 |
| H | 4.014957296195  | 2.064537631439  | -0.372672917415 |
| H | 2.831013917235  | 2.771726077100  | -1.522749537627 |

|   |                 |                 |                 |
|---|-----------------|-----------------|-----------------|
| H | 4.072444061787  | 1.616387885857  | -2.106704694457 |
| O | 0.620633601930  | 2.066941078857  | -0.036462626668 |
| C | 0.446215438402  | 3.102932659932  | 1.009669255392  |
| H | 1.328863951999  | 3.139562149977  | 1.646605851061  |
| H | -0.442179333615 | 2.862474067620  | 1.592667401581  |
| H | 0.313726461085  | 4.037823573295  | 0.469159851091  |
| C | 0.127145964539  | -1.854000972315 | -2.524101371882 |
| O | 0.278225709751  | -2.341972903985 | -3.588331650661 |
| C | 1.600043946724  | -2.347984025900 | -0.406283658774 |
| O | 2.576810057998  | -3.000177498236 | -0.293571151435 |
| C | -0.789494765902 | -2.526245704415 | 0.705285839578  |
| O | -1.280888176193 | -3.353242394151 | 1.393349891029  |

Table S35. Cartesian coordinates (in Å) of the  $T_1/S_0$ -MESX at 3.577 eV of energy ( $T_1$ : -1600.496615,  $S_0$ : -1600.496616 hartree), of *fac*-[Re<sup>I</sup>(bpy)(CO)<sub>3</sub>P(OMe)<sub>3</sub>]<sup>+</sup>.

| Atom | <i>x</i>        | <i>y</i>        | <i>z</i>        |
|------|-----------------|-----------------|-----------------|
| Re   | 0.278199610749  | -0.513788443966 | -1.672971510159 |
| P    | 0.539679173687  | 1.520952739923  | 3.435505099035  |
| N    | -0.694129667481 | 0.002335468436  | 0.227086389978  |
| N    | -1.470511748009 | 0.651798236263  | -2.255424581542 |
| C    | -0.225342039066 | -0.331788160239 | 1.417712954211  |



|   |                 |                 |                 |
|---|-----------------|-----------------|-----------------|
| C | -1.798910551396 | 0.941456885502  | -3.540959479916 |
| C | -0.786911345648 | 0.158753048445  | 2.675769917744  |
| C | -2.905617075001 | 1.717119512253  | -3.869562660200 |
| C | -2.113065880456 | 0.783575130616  | 2.529669305192  |
| C | -3.708523516827 | 2.221176825848  | -2.836041309730 |
| C | -2.586588240937 | 1.116076372056  | 1.289115561336  |
| C | -3.382332761357 | 1.931425233418  | -1.516134832081 |
| C | -1.854623546977 | 0.782838666283  | 0.114958329920  |
| C | -2.255192439439 | 1.135219102838  | -1.224919948304 |
| H | 0.653385974081  | -0.960487917091 | 1.451826922542  |
| H | -1.155356886437 | 0.536931635079  | -4.308635695725 |
| H | -0.713000054000 | -0.587872433857 | 3.474563602632  |
| H | -3.126786919429 | 1.922305053997  | -4.908646010547 |
| H | -2.690110301473 | 1.010468683933  | 3.418093532473  |
| H | -4.574225104151 | 2.832501799478  | -3.059748755331 |
| H | -3.545190877598 | 1.608925907490  | 1.197207620077  |
| H | -3.990505608834 | 2.323746489107  | -0.713211306244 |
| O | 1.713200408036  | 0.363476731313  | 3.564502849499  |
| C | 3.143374997234  | 0.697882027375  | 3.750077444854  |
| H | 3.339700779874  | 0.881478008131  | 4.807909012344  |
| H | 3.414096815054  | 1.575375281877  | 3.156740465326  |
| H | 3.701761438953  | -0.171661465751 | 3.408269621618  |
| O | 1.201117453035  | 1.245478012541  | -1.319871992425 |

|   |                 |                 |                 |
|---|-----------------|-----------------|-----------------|
| C | 2.418711292349  | 1.800783908921  | -1.870935037922 |
| H | 2.967652786657  | 2.299350314957  | -1.066571073915 |
| H | 2.143634505702  | 2.551615005522  | -2.622575712913 |
| H | 3.046385167571  | 1.034602396011  | -2.336896642540 |
| O | -0.061323947900 | 1.687778112187  | 4.944422787637  |
| C | -0.206963636002 | 0.661192273282  | 6.001760392990  |
| H | 0.594226874579  | -0.075259113779 | 5.925364759269  |
| H | -1.183218900233 | 0.182479233770  | 5.902212515305  |
| H | -0.146547914230 | 1.193017883992  | 6.949695500646  |
| C | -0.818701232230 | -2.166047080748 | -1.823539558993 |
| O | -1.467211634066 | -3.140749305102 | -1.908038813878 |
| C | 1.026400725048  | -0.782298749316 | -3.453511249418 |
| O | 1.462600139889  | -0.939767449131 | -4.537719497509 |
| C | 1.785334871394  | -1.576448263797 | -0.976642342091 |
| O | 2.676716856365  | -2.217551877107 | -0.557021970341 |

Table S36. Cartesian coordinates (in Å) of the  $T_1/S_0$ -MESX at 3.606 eV of energy ( $T_1$ : -1600.495515,  $S_0$ : -1600.495515 hartree), of *fac*-[Re<sup>I</sup>(bpy)(CO)<sub>3</sub>P(OMe)<sub>3</sub>]<sup>+</sup>.

| Atom | <i>x</i>       | <i>y</i>       | <i>z</i>       |
|------|----------------|----------------|----------------|
| Re   | 0.121070227692 | 0.816042850829 | 0.084345082359 |
| P    | 1.799973865842 | 1.360244173462 | 1.842581371022 |

|   |                 |                 |                 |
|---|-----------------|-----------------|-----------------|
| N | -1.800065886780 | 1.396353577496  | 1.158923058358  |
| N | -1.486109621442 | 0.419838840287  | -1.325208905997 |
| C | -1.882578393988 | 1.894019140493  | 2.417724578005  |
| C | -1.234865201051 | -0.064960597705 | -2.569758377610 |
| C | -3.105412777448 | 2.219861961095  | 3.003272302262  |
| C | -2.261415336127 | -0.320279991559 | -3.473913189443 |
| C | -4.280151019211 | 2.027486706879  | 2.273693359726  |
| C | -3.581696017786 | -0.070457056343 | -3.088804617521 |
| C | -4.196922233306 | 1.516903402039  | 0.977263570201  |
| C | -3.835584097132 | 0.428840961756  | -1.811061252860 |
| C | -2.946458573167 | 1.206208050988  | 0.430194622778  |
| C | -2.773457366113 | 0.672736037913  | -0.931800690650 |
| H | -0.947594056643 | 2.022320474749  | 2.945263673690  |
| H | -0.194472860989 | -0.238384466937 | -2.813880620692 |
| H | -3.125406195581 | 2.613916500091  | 4.011267752724  |
| H | -2.022440232055 | -0.705996032067 | -4.456303617596 |
| H | -5.245304657468 | 2.269169869865  | 2.701500181177  |
| H | -4.401844425833 | -0.259125093487 | -3.770416592203 |
| H | -5.100020759219 | 1.364823988032  | 0.403069960565  |
| H | -4.853136227814 | 0.626369135303  | -1.505537937208 |
| O | 2.768506511271  | 0.197783358754  | 2.410569395689  |
| C | 3.819896367276  | -0.586155939655 | 1.724061128325  |
| H | 4.464379538579  | -0.957938207261 | 2.518450811467  |

|   |                 |                 |                 |
|---|-----------------|-----------------|-----------------|
| H | 4.377503214722  | 0.048233423251  | 1.035152270946  |
| H | 3.355163768488  | -1.412095040824 | 1.186532447317  |
| O | 2.773678350535  | 2.534446313443  | 1.315813253146  |
| C | 3.967233971546  | 3.107152389842  | 1.994326072098  |
| H | 4.481350904418  | 2.341643853703  | 2.577381632908  |
| H | 3.640532959154  | 3.928855408258  | 2.632340226711  |
| H | 4.609993023375  | 3.474081129892  | 1.197288697204  |
| O | 1.103761343189  | 1.828224495797  | 3.214786938962  |
| C | 1.662370760147  | 1.843990052760  | 4.593132075246  |
| H | 2.141926760150  | 0.888391796599  | 4.800506867222  |
| H | 0.806309353788  | 2.002889513813  | 5.244705000276  |
| H | 2.371733865723  | 2.667084539214  | 4.684434246678  |
| C | -0.017264160459 | -1.046271172414 | 0.774575027865  |
| O | -0.090061753472 | -2.145515265355 | 1.177316702157  |
| C | 0.323774424163  | 2.665198518693  | -0.638715300534 |
| O | 0.456790318982  | 3.747436343812  | -1.067140418679 |
| C | 1.994025938891  | 0.280382587118  | -0.864170466652 |
| O | 1.898691287068  | -0.124065402965 | -2.030556470028 |

---

Table S37. Cartesian coordinates (in Å) of the  $T_1/S_0$ -MESX at 3.891 eV of energy ( $T_1$ : -1600.485074,  $S_0$ : -1600.485074 hartree), of *fac*-[Re<sup>I</sup>(bpy)(CO)<sub>3</sub>P(OMe)<sub>3</sub>]<sup>+</sup>.

| Atom | <i>x</i>        | <i>y</i>        | <i>z</i>        |
|------|-----------------|-----------------|-----------------|
| Re   | 0.361879674283  | -0.966675435531 | -0.158962411938 |
| P    | 1.840246147133  | 0.634299686892  | 1.036723696257  |
| N    | -1.384205045660 | -0.266229333361 | 1.002315200237  |
| N    | -0.473058757182 | 0.653118514599  | -1.347213053745 |
| C    | -1.863114225604 | -0.924814233352 | 2.093444521139  |
| C    | -0.238634725212 | 0.877038185641  | -2.645513882864 |
| C    | -3.010328642848 | -0.511751370338 | 2.760766685300  |
| C    | -0.933455765272 | 1.827295278476  | -3.412693357737 |
| C    | -3.692513154588 | 0.615564543679  | 2.293163475762  |
| C    | -2.007699807367 | 2.542567230850  | -2.824719692148 |
| C    | -3.201840160869 | 1.293366247118  | 1.174778398631  |
| C    | -2.282650304738 | 2.385224349129  | -1.492662718243 |
| C    | -2.045367879597 | 0.835494047737  | 0.538533852517  |
| C    | -1.390455089258 | 1.560580860986  | -0.621512675747 |
| H    | -1.306788455319 | -1.792259186410 | 2.416559283216  |
| H    | 0.502829770383  | 0.245584537177  | -3.119060046115 |
| H    | -3.356422726468 | -1.065156331807 | 3.623934649841  |
| H    | -0.683320804262 | 1.947344399294  | -4.458438317934 |
| H    | -4.590777130929 | 0.963633017150  | 2.788566524852  |
| H    | -2.620724160507 | 3.194941065392  | -3.435482715066 |
| H    | -3.717728026378 | 2.169654405754  | 0.808840889975  |
| H    | -3.093827136747 | 2.931877494630  | -1.029200149334 |

|   |                 |                 |                 |
|---|-----------------|-----------------|-----------------|
| O | 3.424955026200  | 0.392479645229  | 0.936895346314  |
| C | 4.435242605753  | 1.004020266206  | 0.039239104961  |
| H | 5.396888855106  | 0.761695430314  | 0.485443400360  |
| H | 4.283257832466  | 2.081715127710  | -0.000525177460 |
| H | 4.349957617271  | 0.559026355341  | -0.952794504023 |
| O | 1.805287179041  | 2.239142320002  | 0.567911626389  |
| C | 0.782760348779  | 3.162477413267  | 0.794452625951  |
| H | 0.316519779639  | 3.165315043039  | 1.774675378008  |
| H | -0.680164256657 | 2.315040386797  | -0.104708794366 |
| H | 0.891146060876  | 4.065290930918  | 0.209857468154  |
| O | 1.562103443985  | 0.638413857025  | 2.619390586257  |
| C | 2.414160840150  | 1.266885510062  | 3.670116705093  |
| H | 3.388775555941  | 0.779831118309  | 3.673971249650  |
| H | 1.884928537088  | 1.094015188931  | 4.603539093819  |
| H | 2.514205169506  | 2.335069686086  | 3.473382115129  |
| C | -0.797491918277 | -2.255856642099 | -1.089112286945 |
| O | -1.478138378864 | -3.039693150740 | -1.640282055818 |
| C | 1.833826108821  | -1.409400187024 | -1.345796443243 |
| O | 2.717655261803  | -1.666813409845 | -2.088076519137 |
| C | 0.938905763393  | -2.345974306756 | 1.091522322600  |
| O | 1.271466029680  | -3.176272284578 | 1.863995873257  |

---

Table S38. Cartesian coordinates (in Å) of the  $T_1/S_0$ -MESX at 3.913 eV of energy ( $T_1$ : -1600.484242,  $S_0$ : -1600.484242 hartree), of *fac*-[Re<sup>I</sup>(bpy)(CO)<sub>3</sub>P(OMe)<sub>3</sub>]<sup>+</sup>.

| Atom | <i>x</i>        | <i>y</i>        | <i>z</i>        |
|------|-----------------|-----------------|-----------------|
| Re   | 0.076929859103  | 0.215659965253  | 0.715893426836  |
| P    | 2.068924747888  | 1.551169886519  | 0.630020749529  |
| N    | -1.989751043484 | -0.367627436332 | 1.221725617446  |
| N    | -1.244899712282 | 1.743379440549  | -0.219019194660 |
| C    | -2.297576626399 | -1.449658970942 | 1.986159897525  |
| C    | -0.792847298332 | 2.763863088314  | -1.000008752494 |
| C    | -3.596307583339 | -1.724305312411 | 2.403056832849  |
| C    | -1.652401995606 | 3.702379901819  | -1.561098266691 |
| C    | -4.626258413058 | -0.857847467417 | 2.027187958575  |
| C    | -3.026503793518 | 3.587646636093  | -1.329551182515 |
| C    | -4.320316563895 | 0.252991814315  | 1.240254157927  |
| C    | -3.496905939454 | 2.535380065797  | -0.543608705429 |
| C    | -2.998436763984 | 0.483438520191  | 0.842082475958  |
| C    | -2.592979065770 | 1.620940886634  | 0.009920554110  |
| H    | -1.479207049188 | -2.098510610847 | 2.257291707787  |
| H    | 0.272452786961  | 2.804157762012  | -1.175171009782 |
| H    | -3.787484120527 | -2.598985514818 | 3.011091049932  |
| H    | -1.247512448074 | 4.499359057722  | -2.170991555778 |
| H    | -5.646765421587 | -1.039464452236 | 2.340828203146  |

|   |                 |                 |                 |
|---|-----------------|-----------------|-----------------|
| H | -3.721837316005 | 4.298527741770  | -1.758553873942 |
| H | -5.106777639291 | 0.932412697250  | 0.943731733328  |
| H | -4.558536546845 | 2.428819477376  | -0.371144985926 |
| O | 3.460645648348  | 0.955652740727  | 1.212410763926  |
| C | 4.073869169839  | -0.349985768227 | 0.872768096504  |
| H | 4.869324128237  | -0.491790123945 | 1.600688540914  |
| H | 4.482629506590  | -0.305096073059 | -0.137830361466 |
| H | 3.337178681639  | -1.151326740277 | 0.953043043893  |
| O | 2.384026728049  | 2.123416008319  | -0.845884392888 |
| C | 3.461779660141  | 3.098617955136  | -1.173983719214 |
| H | 4.413332744996  | 2.738553880466  | -0.781337820438 |
| H | 3.206198318140  | 4.067515385191  | -0.745833994921 |
| H | 3.483130842698  | 3.142383672186  | -2.260016770456 |
| O | 1.986509495302  | 2.928293847282  | 1.473006680516  |
| C | 2.011648122694  | 3.062465108996  | 2.947463520898  |
| H | 2.921727704298  | 2.606717273942  | 3.339394408100  |
| H | 1.123991157627  | 2.595015152720  | 3.378485069880  |
| H | 2.004415867205  | 4.132999201286  | 3.138830595322  |
| C | 0.305851992376  | -2.077290997073 | 0.629394976290  |
| O | 1.213448522125  | -2.843954553682 | 0.538689714804  |
| C | 0.624227422579  | -0.244777887512 | -1.130379714408 |
| O | 1.041293629280  | -0.509737877487 | -2.201848348645 |
| C | 0.902841991987  | -0.378155656991 | 2.394563494142  |



---

|   |                |                 |                |
|---|----------------|-----------------|----------------|
| O | 1.395173596659 | -0.803283728081 | 3.391242844380 |
|---|----------------|-----------------|----------------|

---

Table S39. Cartesian coordinates (in Å) of the  $T_1/S_0$ -MESX at 3.970 eV of energy ( $T_1$ : -1600.482172,  $S_0$ : -1600.482173 hartree), of *fac*-[Re<sup>I</sup>(bpy)(CO)<sub>3</sub>P(OMe)<sub>3</sub>]<sup>+</sup>.

---

| Atom | <i>x</i>        | <i>y</i>        | <i>z</i>        |
|------|-----------------|-----------------|-----------------|
| Re   | -0.072680840640 | -0.952527304785 | -0.299000413062 |
| P    | 1.734071326272  | 0.706457773711  | 0.126726537941  |
| N    | -1.132764085438 | -0.110071619615 | 1.351999239055  |
| N    | -1.268304485335 | 0.722381719295  | -1.124138082946 |
| C    | -0.905131815382 | -0.368205701441 | 2.764390563267  |
| C    | -1.242899679345 | 1.116553235070  | -2.420938688934 |
| C    | -2.150167544977 | -0.580906084158 | 3.565506929170  |
| C    | -2.019302196596 | 2.177006286572  | -2.886180145019 |
| C    | -3.115418673234 | 0.357125591831  | 3.314460679177  |
| C    | -2.850230434832 | 2.855870158228  | -1.990988331458 |
| C    | -2.970581386370 | 1.204067175160  | 2.162161672185  |
| C    | -2.886314145376 | 2.449804734876  | -0.654939419001 |
| C    | -2.033647687313 | 0.866738430507  | 1.136983333924  |
| C    | -2.089931984048 | 1.379196665403  | -0.238519401063 |
| H    | -0.243382032653 | 0.405081578659  | 3.178842660296  |
| H    | -0.586375681566 | 0.570802418131  | -3.082257950722 |

---

|   |                 |                 |                 |
|---|-----------------|-----------------|-----------------|
| H | -2.244431666590 | -1.365260442360 | 4.306633806004  |
| H | -1.965534429052 | 2.459492608234  | -3.929478329741 |
| H | -4.034057789924 | 0.408021853226  | 3.888362249736  |
| H | -3.460558795479 | 3.686109923277  | -2.324024111201 |
| H | -3.714619532629 | 1.966258813312  | 1.972820889895  |
| H | -3.521861889092 | 2.965899929107  | 0.051853427140  |
| O | 3.215659766603  | 0.206020910396  | 0.584234987420  |
| C | 4.095280195723  | -0.703905116838 | -0.182549118476 |
| H | 5.035874820013  | -0.725577772410 | 0.363182161591  |
| H | 4.249635736312  | -0.317343076115 | -1.191728238603 |
| H | 3.657608367442  | -1.703141466748 | -0.216933040479 |
| O | 1.980954905257  | 1.583987778062  | -1.214280498116 |
| C | 2.931878417520  | 2.711101849479  | -1.399308204642 |
| H | 3.876137080566  | 2.498991825786  | -0.895045565418 |
| H | 2.477262970035  | 3.622729591169  | -1.009221078925 |
| H | 3.084890781088  | 2.792442794206  | -2.473116467044 |
| O | 1.397842804358  | 1.697262567044  | 1.351191084452  |
| C | 2.324349470004  | 2.531498379116  | 2.161665989770  |
| H | 3.212594579517  | 1.953020475289  | 2.413027071934  |
| H | 1.764027869203  | 2.794574591717  | 3.055849863417  |
| H | 2.588311593859  | 3.427664149435  | 1.599113541831  |
| C | -1.532223209595 | -2.224313393695 | -0.670558561722 |
| O | -2.392210399915 | -2.990938538641 | -0.902513944812 |

|   |                |                 |                 |
|---|----------------|-----------------|-----------------|
| C | 0.824489691690 | -1.477653736121 | -1.953755241727 |
| O | 1.341312383536 | -1.775856460902 | -2.973417900710 |
| C | 0.870089097024 | -2.309860949028 | 0.721152369436  |
| O | 1.418422259603 | -3.126381134514 | 1.376345832201  |

---

Table S40. Cartesian coordinates (in Å) of the  $T_1/S_0$ -MESX at 4.051 eV of energy ( $T_1$ : -1600.479176,  $S_0$ : -1600.479176 hartree), of *fac*-[Re<sup>I</sup>(bpy)(CO)<sub>3</sub>P(OMe)<sub>3</sub>]<sup>+</sup>.

| Atom | <i>x</i>        | <i>y</i>        | <i>z</i>        |
|------|-----------------|-----------------|-----------------|
| Re   | 0.321822223058  | -1.143147518353 | -0.789798749036 |
| P    | 1.855864896941  | 0.432257362452  | 0.394166644195  |
| N    | -1.283802982286 | -0.606865175496 | 0.621808950636  |
| N    | -0.745138164751 | 0.553078773311  | -1.731971231755 |
| C    | -1.357032970808 | -0.948420635040 | 1.942202662988  |
| C    | -0.412574881549 | 1.139475121171  | -2.904877373462 |
| C    | -2.160234649132 | -0.208535608047 | 2.890949334089  |
| C    | -1.185971514606 | 2.153331360763  | -3.477252151096 |
| C    | -3.107941134445 | 0.655572978438  | 2.430036945112  |
| C    | -2.356713953413 | 2.572255098337  | -2.830489575811 |
| C    | -3.413926449187 | 0.445653394261  | 0.981829595331  |
| C    | -2.722540274255 | 1.964784930543  | -1.631533166885 |
| C    | -2.189442195638 | 0.305141087481  | 0.149456726520  |

|   |                 |                 |                 |
|---|-----------------|-----------------|-----------------|
| C | -1.898569028406 | 0.963749691804  | -1.082373323167 |
| H | -0.634287018601 | -1.672222087043 | 2.288726935787  |
| H | 0.489196047087  | 0.787820316388  | -3.385290204144 |
| H | -1.902794960220 | -0.291033151804 | 3.940941968693  |
| H | -0.873189263347 | 2.594347095873  | -4.414611580367 |
| H | -3.629163971727 | 1.373673815015  | 3.052150532859  |
| H | -2.974681797354 | 3.351172564336  | -3.259469772912 |
| H | -4.125864857000 | -0.376265663724 | 0.813445457176  |
| H | -3.629973191091 | 2.243963200926  | -1.110768543643 |
| O | 3.453887898147  | 0.222492072612  | 0.193189403685  |
| C | 4.189678480056  | -1.050612939412 | 0.345277806704  |
| H | 4.046994626715  | -1.453300479575 | 1.349728693872  |
| H | 5.235080745649  | -0.794407274246 | 0.189052988534  |
| H | 3.865832177553  | -1.769750988922 | -0.408182214788 |
| O | 1.887592764920  | 2.006186617365  | -0.005829603995 |
| C | 0.850082340390  | 3.013204062149  | 0.309843581962  |
| H | 0.332561266673  | 2.760909325316  | 1.237396054587  |
| H | 0.145755812197  | 3.073133685432  | -0.519387730260 |
| H | 1.380044106273  | 3.957271320902  | 0.420504230001  |
| O | 1.576390423442  | 0.375888526985  | 1.990856889076  |
| C | 2.376740074314  | 1.058316247615  | 3.045595564440  |
| H | 3.248241917293  | 0.445410885455  | 3.277211717511  |
| H | 1.718108314743  | 1.131936892625  | 3.907939684621  |

|   |                 |                 |                 |
|---|-----------------|-----------------|-----------------|
| H | 2.682749177072  | 2.049792829363  | 2.708713498918  |
| C | -0.890725600875 | -2.383254996539 | -1.722512931685 |
| O | -1.596886787623 | -3.138625601207 | -2.281318135044 |
| C | 1.656081055159  | -1.389989307580 | -2.179632357741 |
| O | 2.449508620087  | -1.525727328567 | -3.045863456041 |
| C | 1.038293724400  | -2.621160017706 | 0.244469367381  |
| O | 1.432351510531  | -3.526950968249 | 0.894232525024  |

Table S41. Cartesian coordinates (in Å) of the  $T_1/S_0$ -MESX at 4.326 eV of energy ( $T_1$ : -1600.469061,  $S_0$ : -1600.469061 hartree), of *fac*-[Re<sup>I</sup>(bpy)(CO)<sub>3</sub>P(OMe)<sub>3</sub>]<sup>+</sup>.

| Atom | <i>x</i>        | <i>y</i>        | <i>z</i>        |
|------|-----------------|-----------------|-----------------|
| Re   | -0.385357549400 | -1.129488937592 | -0.799487586889 |
| P    | 2.012067061644  | 1.183947465992  | 0.221142426975  |
| N    | -1.416392941831 | -0.579913573542 | 0.988094185571  |
| N    | -1.911214112979 | 0.265166650752  | -1.470557173173 |
| C    | -1.119693161481 | -1.068716224370 | 2.235515651254  |
| C    | -2.078994062311 | 0.648685395732  | -2.766947144111 |
| C    | -1.819556649826 | -0.685718346713 | 3.367753811364  |
| C    | -3.052070527624 | 1.565242470878  | -3.143953667445 |
| C    | -2.871514950403 | 0.236112523027  | 3.245581393466  |
| C    | -3.887891613465 | 2.113220825283  | -2.160183470837 |

|   |                 |                 |                 |
|---|-----------------|-----------------|-----------------|
| C | -3.184342532047 | 0.739377193132  | 1.984994221883  |
| C | -3.719388980025 | 1.727316104080  | -0.832304875815 |
| C | -2.457170264541 | 0.327822782404  | 0.860108622031  |
| C | -2.722986065598 | 0.798378046357  | -0.497130940010 |
| H | -0.304953693139 | -1.774686626532 | 2.291519543237  |
| H | -1.410255372040 | 0.202767934536  | -3.490054668856 |
| H | -1.546512867962 | -1.102666141801 | 4.328612871169  |
| H | -3.153087223198 | 1.841685440693  | -4.185530357879 |
| H | -3.434295347112 | 0.552044331346  | 4.115083818574  |
| H | -4.656039898060 | 2.829158610443  | -2.425475701620 |
| H | -3.994160617440 | 1.447724342613  | 1.875482992743  |
| H | -4.355714498907 | 2.146578132907  | -0.065113091607 |
| O | 2.575370694976  | 0.255216922981  | 1.381541531211  |
| C | 3.837212698915  | -0.545408246770 | 1.431308789175  |
| H | 4.131307430301  | -0.544727609324 | 2.477516758787  |
| H | 4.599246545424  | -0.074358125728 | 0.810781201909  |
| H | 3.605088332830  | -1.551091547066 | 1.086632870835  |
| O | 3.164847064756  | 2.035199994641  | -0.438497497830 |
| C | 3.936714269147  | 3.240849766048  | -0.003598828812 |
| H | 4.404769355566  | 3.045868155567  | 0.960528979654  |
| H | 3.251544241856  | 4.086089558442  | 0.047131712964  |
| H | 4.683107989554  | 3.386659741963  | -0.779286558071 |
| O | 0.908383682290  | 2.061314968975  | 0.926428955869  |

|   |                 |                 |                 |
|---|-----------------|-----------------|-----------------|
| C | 0.784746207593  | 2.539570889509  | 2.339127735925  |
| H | 1.251646753649  | 1.815292679443  | 3.004640356069  |
| H | -0.283966231631 | 2.613022532906  | 2.519583340419  |
| H | 1.264703488919  | 3.514380727145  | 2.406818246112  |
| C | -0.665115602375 | -2.446624521340 | -2.232266487767 |
| O | -0.783628766056 | -3.200552217485 | -3.146586622550 |
| C | 1.098467212387  | 0.251075171737  | -1.191415044362 |
| O | 1.475907940753  | 0.540391058536  | -2.348318906821 |
| C | 0.846006623166  | -2.360615485630 | 0.020287880132  |
| O | 1.586348715437  | -3.126525687241 | 0.556699745369  |

Table S42. Cartesian coordinates (in Å) of the  $T_1/S_0$ -MESX at 4.433 eV of energy ( $T_1$ : -1600.465142,  $S_0$ : -1600.465143 hartree), of *fac*-[Re<sup>I</sup>(bpy)(CO)<sub>3</sub>P(OMe)<sub>3</sub>]<sup>+</sup>.

| Atom | <i>x</i>        | <i>y</i>        | <i>z</i>        |
|------|-----------------|-----------------|-----------------|
| Re   | 0.207119292253  | -0.681820552554 | -0.740731735664 |
| P    | 1.455613177688  | 1.048757787086  | 0.533479854657  |
| N    | -1.388412701543 | -0.513797228393 | 0.793376225203  |
| N    | -1.091837794488 | 0.957350093655  | -1.443176452184 |
| C    | -1.682216406214 | -1.392634571068 | 1.777505836303  |
| C    | -1.069821564142 | 1.564790335511  | -2.639308666355 |
| C    | -2.783128983248 | -1.233186029339 | 2.656199429462  |

|   |                 |                 |                 |
|---|-----------------|-----------------|-----------------|
| C | -1.981330737374 | 2.588646638151  | -2.972018550230 |
| C | -3.508769436742 | -0.068012708583 | 2.630326909093  |
| C | -2.902841176957 | 3.040714988610  | -2.021707752975 |
| C | -3.167485371601 | 0.989556182918  | 1.666012736372  |
| C | -3.083384618298 | 2.309142644648  | -0.828582052873 |
| C | -2.180439592025 | 0.587190806098  | 0.648836117850  |
| C | -2.102022124721 | 1.330829571444  | -0.556375014618 |
| H | -1.041057254657 | -2.260123532680 | 1.857221803933  |
| H | -0.300574629231 | 1.262453359917  | -3.336792673615 |
| H | -2.988849288343 | -2.015607586071 | 3.374245011146  |
| H | -1.940131133326 | 3.017018429176  | -3.967296617304 |
| H | -4.285167943228 | 0.123627925673  | 3.362213578036  |
| H | -3.522344459738 | 3.904054651251  | -2.246359922318 |
| H | -2.835510236051 | 1.881725193255  | 2.227098410553  |
| H | -3.990307419937 | 1.476077845685  | 1.053375167485  |
| O | 2.753076579041  | 0.668293356449  | 1.443253532891  |
| C | 4.019918559015  | 0.088136283565  | 0.941124889254  |
| H | 4.730491256100  | 0.193517348706  | 1.757959131635  |
| H | 4.366833336514  | 0.636054093511  | 0.062909838506  |
| H | 3.872126666775  | -0.966211230646 | 0.703211899706  |
| O | 1.984070173046  | 2.195839871060  | -0.484202553673 |
| C | 2.731515366253  | 3.435922355953  | -0.147524647390 |
| H | 3.449698691573  | 3.244093398304  | 0.651397988484  |



|   |                 |                 |                 |
|---|-----------------|-----------------|-----------------|
| H | 2.018397925468  | 4.206685538676  | 0.147596035542  |
| H | 3.247659162454  | 3.724758514192  | -1.060390884772 |
| O | 0.524958089332  | 1.726939454932  | 1.660047101822  |
| C | 0.914841167413  | 2.545874900511  | 2.836973674781  |
| H | 1.816379166225  | 2.133212914130  | 3.288701225138  |
| H | 0.073053959802  | 2.484646170410  | 3.523012863798  |
| H | 1.073102304452  | 3.576698876792  | 2.517796541593  |
| C | -0.855607642807 | -1.987091540086 | -1.758926772565 |
| O | -1.478241130837 | -2.771720572816 | -2.375211102315 |
| C | 1.515152408817  | -0.586147878265 | -2.170118216685 |
| O | 2.297060661428  | -0.511610700943 | -3.052859267545 |
| C | 1.190133182523  | -2.120603221272 | 0.115746128541  |
| O | 1.768639139443  | -2.998781530479 | 0.657680509463  |

Table S43. Cartesian coordinates (in Å) of the  $T_1/S_0$ -MESX at 4.508 eV of energy ( $T_1$ : -1600.462396,  $S_0$ : -1600.462396 hartree), of *fac*-[Re<sup>I</sup>(bpy)(CO)<sub>3</sub>P(OMe)<sub>3</sub>]<sup>+</sup>.

| Atom | <i>x</i>        | <i>y</i>        | <i>z</i>        |
|------|-----------------|-----------------|-----------------|
| Re   | 0.498792166340  | -0.806435381617 | -0.328380485271 |
| P    | 1.907407215661  | 0.965928225162  | 0.556296302342  |
| N    | -1.022490432720 | -0.412440805050 | 1.213347725568  |
| N    | -0.802304165403 | 0.817729451674  | -1.151410973481 |

|   |                 |                 |                 |
|---|-----------------|-----------------|-----------------|
| C | -1.213269036063 | -0.312234555745 | 2.515029105903  |
| C | -0.513496287076 | 1.817127921603  | -2.020367079099 |
| C | -2.508508395112 | -0.383185582560 | 3.091796285551  |
| C | -1.486182942019 | 2.739241630711  | -2.407238253997 |
| C | -3.631409124277 | -0.669378841378 | 2.271245155405  |
| C | -2.779206861632 | 2.637106053182  | -1.882979990860 |
| C | -3.507357424239 | -0.758036446950 | 0.904881520688  |
| C | -3.078293040987 | 1.606099325540  | -0.983138871138 |
| C | -2.187774789143 | -0.503337323861 | 0.267637869470  |
| C | -2.070433651206 | 0.712861836137  | -0.641944229936 |
| H | -0.329576272660 | -0.218573753696 | 3.135184779520  |
| H | 0.504200392698  | 1.871644211438  | -2.378463450706 |
| H | -2.613764380556 | -0.287222896561 | 4.164178858495  |
| H | -1.226784618898 | 3.524404640576  | -3.105584486401 |
| H | -4.597021638863 | -0.832480729095 | 2.736014769879  |
| H | -3.545183441967 | 3.348042448337  | -2.168088249464 |
| H | -4.350957671183 | -0.999750005048 | 0.268568413918  |
| H | -4.068288778722 | 1.500435391745  | -0.558976838071 |
| O | 3.298244554577  | 0.549873401816  | 1.287670762586  |
| C | 4.470486469928  | -0.105511146623 | 0.662973654020  |
| H | 5.283093944018  | 0.018384814286  | 1.375222905529  |
| H | 4.714763576335  | 0.378794880304  | -0.284164868149 |
| H | 4.257597830979  | -1.164416079898 | 0.510471206383  |

|   |                 |                 |                 |
|---|-----------------|-----------------|-----------------|
| O | 2.334678850831  | 1.990730095378  | -0.623207458245 |
| C | 3.130545669925  | 3.242439425515  | -0.497843970613 |
| H | 3.972419802693  | 3.090019900938  | 0.179164099552  |
| H | 2.477922634801  | 4.039244739287  | -0.139225346617 |
| H | 3.485270303823  | 3.462603212224  | -1.501924146655 |
| O | 1.201484340932  | 1.787195920757  | 1.741251365853  |
| C | 1.824044583671  | 2.595456943837  | 2.824799763342  |
| H | 2.686707843366  | 2.065192388992  | 3.226175182085  |
| H | 1.047510136245  | 2.706456177820  | 3.577784698045  |
| H | 2.113060526984  | 3.568381102397  | 2.426208158675  |
| C | -1.458505737420 | -1.616792496729 | -0.608541279313 |
| O | -1.935397599721 | -2.597314205564 | -1.161770224969 |
| C | 1.484504188620  | -1.080208535216 | -1.980750996397 |
| O | 2.045029078099  | -1.227483979546 | -3.011443704809 |
| C | 1.360376365663  | -2.242495255472 | 0.658206965204  |
| O | 1.838473593228  | -3.115936528753 | 1.293856895170  |

Table S44. Cartesian coordinates (in Å) of the  $T_1/S_0$ -MESX at 4.558 eV of energy ( $T_1$ : -1600.460548,  $S_0$ : -1600.460548 hartree), of *fac*-[Re<sup>I</sup>(bpy)(CO)<sub>3</sub>P(OMe)<sub>3</sub>]<sup>+</sup>.

| Atom | <i>x</i>       | <i>y</i>        | <i>z</i>        |
|------|----------------|-----------------|-----------------|
| Re   | 0.852890378783 | -0.509611720460 | -0.119478404167 |

|   |                 |                 |                 |
|---|-----------------|-----------------|-----------------|
| P | 1.710567139489  | 1.761531840467  | 0.435857818940  |
| N | -0.481423992910 | -0.264210533958 | 1.547268626068  |
| N | -0.914990929864 | 0.547283120174  | -0.962432873468 |
| C | -1.380907989826 | -1.191747511034 | 2.112911819089  |
| C | -1.076106435021 | 0.854747486827  | -2.272074586934 |
| C | -2.049766352138 | -0.897833963945 | 3.374151832019  |
| C | -2.193537587412 | 1.543772964312  | -2.743621571248 |
| C | -2.437114549293 | 0.431782966765  | 3.600487475115  |
| C | -3.189468304532 | 1.929882129041  | -1.837785351275 |
| C | -2.275904249164 | 1.228413540079  | 2.479129943667  |
| C | -3.041618129203 | 1.611394598151  | -0.489315174723 |
| C | -1.637251901752 | 0.583662140389  | 1.318398246962  |
| C | -1.897317140139 | 0.915068567266  | -0.061357938826 |
| H | -1.423492554099 | -2.195057940978 | 1.698815192833  |
| H | -0.287612185097 | 0.544451988137  | -2.942386270889 |
| H | -2.236785790495 | -1.706379123855 | 4.072147797027  |
| H | -2.273863851059 | 1.770257806973  | -3.798814900591 |
| H | -2.842715263548 | 0.785688583451  | 4.537140018975  |
| H | -4.068608943956 | 2.462814575522  | -2.178843969425 |
| H | -2.570009457514 | 2.270556308551  | 2.430920224098  |
| H | -3.803172437529 | 1.883259353836  | 0.230326095611  |
| O | 3.097236459194  | 1.961734143841  | 1.269685697517  |
| C | 4.445909377517  | 1.550763994845  | 0.818706511282  |

|   |                 |                 |                 |
|---|-----------------|-----------------|-----------------|
| H | 5.140952222856  | 2.043364291123  | 1.495206711186  |
| H | 4.618078869011  | 1.879100244945  | -0.208191302718 |
| H | 4.547417961782  | 0.467295500458  | 0.896983595331  |
| O | 1.928503517664  | 2.591440878871  | -0.943234859409 |
| C | 2.327886038732  | 4.015912890521  | -1.078682246571 |
| H | 3.117339627727  | 4.260499472804  | -0.365813017664 |
| H | 1.451763409401  | 4.646156444678  | -0.919158210478 |
| H | 2.691787899071  | 4.123013195585  | -2.098121698811 |
| O | 0.709266635298  | 2.598201854012  | 1.380159463662  |
| C | 0.996268117030  | 3.743142831226  | 2.281510666185  |
| H | 1.949493022737  | 3.584308139848  | 2.784328842094  |
| H | 0.176401460204  | 3.760386071885  | 2.996214582619  |
| H | 1.012680565007  | 4.664117764271  | 1.697331123311  |
| C | 0.114813889632  | -2.253458486977 | -0.639236543544 |
| O | -0.299896458543 | -3.299630624761 | -0.988145105305 |
| C | 1.961132099747  | -0.509184432130 | -1.726095604758 |
| O | 2.616504841316  | -0.506757546363 | -2.710087427338 |
| C | 2.244409282101  | -1.385413513739 | 0.911619261194  |
| O | 3.058637422514  | -1.925609972044 | 1.577633180916  |

---

Table S45. Cartesian coordinates (in Å) of the  $T_1/S_0$ -MESX at 4.574 eV of energy ( $T_1$ : -1600.459946,  $S_0$ : -1600.459946 hartree), of *fac*-[Re<sup>I</sup>(bpy)(CO)<sub>3</sub>P(OMe)<sub>3</sub>]<sup>+</sup>.

| Atom | <i>x</i>        | <i>y</i>        | <i>z</i>        |
|------|-----------------|-----------------|-----------------|
| Re   | 0.298823389819  | -1.686277733647 | -0.210091074709 |
| P    | 0.433721546815  | 1.382185190567  | 0.900481351436  |
| N    | -1.429885682983 | -1.239867003560 | 1.075684034528  |
| N    | -0.608211893835 | 0.013501475011  | -1.096477062729 |
| C    | -1.989828336968 | -2.112228715769 | 1.961118753998  |
| C    | -0.746879598020 | 0.359749000594  | -2.380272304828 |
| C    | -3.142591490443 | -1.798027893129 | 2.669766129167  |
| C    | -1.482280129581 | 1.479647564762  | -2.805569824915 |
| C    | -3.750274700924 | -0.552478678241 | 2.464360473637  |
| C    | -2.099866065885 | 2.359836746696  | -1.859748453189 |
| C    | -3.173019316255 | 0.350287156102  | 1.570281490043  |
| C    | -1.980669479629 | 2.104362830019  | -0.531864942734 |
| C    | -2.010865336398 | -0.012715137906 | 0.884827018514  |
| C    | -1.230398271437 | 0.894274330331  | -0.025136328944 |
| H    | -1.494001604383 | -3.065441340151 | 2.077847867384  |
| H    | -0.275174911606 | -0.287631390586 | -3.109793863746 |
| H    | -3.557523901368 | -2.518590658763 | 3.362540374946  |
| H    | -1.570331263751 | 1.667779923748  | -3.868219670188 |
| H    | -4.659625661172 | -0.289911761383 | 2.991192457595  |
| H    | -2.630310267407 | 3.235925394384  | -2.211579529803 |
| H    | -3.622378801774 | 1.319505131455  | 1.405574385492  |

|   |                 |                 |                 |
|---|-----------------|-----------------|-----------------|
| H | -2.393516346841 | 2.769854295223  | 0.216221940387  |
| O | 1.843068658402  | 1.198927910322  | 1.776137528277  |
| C | 3.075930325764  | 0.477074983260  | 1.421460529754  |
| H | 3.763896528471  | 0.680019908528  | 2.240633212161  |
| H | 3.487415655154  | 0.842822769787  | 0.479382442728  |
| H | 2.874358784631  | -0.593376973843 | 1.355977024987  |
| O | 0.828078267967  | 2.467227417725  | -0.227191068205 |
| C | 2.065590649093  | 3.271114012540  | -0.360995827775 |
| H | 2.515546133597  | 3.454021943163  | 0.614378151798  |
| H | 1.753711909828  | 4.206199944394  | -0.822351882881 |
| H | 2.755140027576  | 2.736154434104  | -1.014671520322 |
| O | -0.398246337321 | 2.047007914610  | 2.111908574406  |
| C | 0.099350402406  | 2.582328326106  | 3.400054059060  |
| H | 0.617803053017  | 1.796939019096  | 3.947678219817  |
| H | -0.794030368906 | 2.906075654479  | 3.929961390884  |
| H | 0.767374346582  | 3.424427222787  | 3.216445037808  |
| C | -0.552122223367 | -3.095497660984 | -1.161552296046 |
| O | -1.103793136533 | -3.947658920806 | -1.776882622038 |
| C | 1.826979699518  | -1.751067710308 | -1.406722637669 |
| O | 2.747209326891  | -1.761955433090 | -2.151599721835 |
| C | 1.133741553037  | -2.987815124979 | 0.977869821883  |
| O | 1.626443485653  | -3.758683843720 | 1.729926003166  |

---

Table S46. Cartesian coordinates (in Å) of the T<sub>1</sub>/S<sub>0</sub>-MESX at 4.842 eV of energy (T<sub>1</sub>: -1600.450103, S<sub>0</sub>: -1600.450103 hartree), of *fac*-[Re<sup>I</sup>(bpy)(CO)<sub>3</sub>P(OMe)<sub>3</sub>]<sup>+</sup>.

| Atom | <i>x</i>        | <i>y</i>        | <i>z</i>        |
|------|-----------------|-----------------|-----------------|
| Re   | 0.034619935693  | -1.022889486536 | -0.505598678869 |
| P    | 1.543423942225  | 0.664695848745  | 0.532018693993  |
| N    | -1.416563789850 | -0.616060948189 | 1.017042190073  |
| N    | -1.129131476691 | 0.723189299158  | -1.237224400240 |
| C    | -1.605485150254 | -1.282261483102 | 2.272386134857  |
| C    | -0.925578393531 | 1.348369635009  | -2.424509506696 |
| C    | -1.580563679425 | -0.526368064099 | 3.505757987491  |
| C    | -1.687179695478 | 2.445321001748  | -2.821453132816 |
| C    | -2.950764142420 | -0.320168483016 | 2.987580007321  |
| C    | -2.691200875040 | 2.921841764117  | -1.971140819043 |
| C    | -3.206903440627 | 0.560731315482  | 1.869822023485  |
| C    | -2.906293903135 | 2.285020171369  | -0.748492482966 |
| C    | -2.265676879512 | 0.425630066808  | 0.833504354373  |
| C    | -2.118861048756 | 1.182592439140  | -0.399486481497 |
| H    | -1.528685452873 | -2.364378926441 | 2.254954104749  |
| H    | -0.138780223381 | 0.956145049928  | -3.052253578933 |
| H    | -1.368196747052 | -0.941609677115 | 4.482086786659  |
| H    | -1.490296861509 | 2.913484660666  | -3.777105651695 |



|   |                 |                 |                 |
|---|-----------------|-----------------|-----------------|
| H | -3.782621722035 | -0.669359749585 | 3.592606488017  |
| H | -3.294466756415 | 3.775529929522  | -2.254595998539 |
| H | -4.078553170938 | 1.200176657207  | 1.833045626178  |
| H | -3.671309031555 | 2.639518695457  | -0.069981012148 |
| O | 2.770216158775  | 0.221425188287  | 1.508204126161  |
| C | 3.949678688296  | -0.581027094425 | 1.110378961302  |
| H | 4.666867361065  | -0.462887991059 | 1.919767448549  |
| H | 4.366310572725  | -0.203786482894 | 0.174497106538  |
| H | 3.664172144241  | -1.628801583502 | 1.008695381751  |
| O | 2.237698634457  | 1.537900990450  | -0.647538504945 |
| C | 3.115752420003  | 2.725755681104  | -0.487038299315 |
| H | 3.852625945110  | 2.550685367709  | 0.298592310089  |
| H | 2.498624794346  | 3.594848962331  | -0.254449253084 |
| H | 3.608882792830  | 2.856329719593  | -1.447624259493 |
| O | 0.757113265606  | 1.662450338066  | 1.518605095353  |
| C | 1.284006936326  | 2.523015638024  | 2.609529334932  |
| H | 2.109658816417  | 2.018598246599  | 3.110222496445  |
| H | 0.448544656941  | 2.671815405545  | 3.289897886559  |
| H | 1.606707179302  | 3.474505271333  | 2.185422240430  |
| C | -1.198874621106 | -2.283434470279 | -1.384836148260 |
| O | -1.921997550974 | -3.038559758507 | -1.921845182763 |
| C | 1.264813114629  | -1.152561876278 | -2.017648700486 |
| O | 1.993095428108  | -1.218815556432 | -2.944492323021 |

|   |                |                 |                |
|---|----------------|-----------------|----------------|
| C | 0.918352197727 | -2.494442052985 | 0.399268304455 |
| O | 1.433338099663 | -3.390747619795 | 0.973832283044 |

---

Table S47. Cartesian coordinates (in Å) of the  $T_1/S_0$ -MESX at 4.886 eV of energy ( $T_1$ : -1600.448476,  $S_0$ : -1600.448476 hartree), of *fac*-[Re<sup>I</sup>(bpy)(CO)<sub>3</sub>P(OMe)<sub>3</sub>]<sup>+</sup>.

| Atom | <i>x</i>        | <i>y</i>        | <i>z</i>        |
|------|-----------------|-----------------|-----------------|
| Re   | 0.708271713857  | -0.093222153184 | -1.296518938973 |
| P    | 2.198069926780  | 1.621323505596  | -0.232942410954 |
| N    | -1.042212403246 | 0.459335711044  | 2.378686588455  |
| N    | -0.942941748628 | 1.293611144334  | -0.970505050421 |
| C    | -1.366344270991 | -0.277947714628 | 3.426665071221  |
| C    | -1.199184309060 | 2.323450678784  | -1.822715205979 |
| C    | -2.141838231440 | -1.471297545148 | 3.375627670669  |
| C    | -2.250246920740 | 3.205562461448  | -1.598866484677 |
| C    | -2.718341432825 | -1.852260703776 | 2.143614418616  |
| C    | -3.057564918968 | 3.025319466308  | -0.469006539934 |
| C    | -2.418153695228 | -1.146155759385 | 1.001811523000  |
| C    | -2.788140234339 | 1.964689684361  | 0.399110437343  |
| C    | -1.383327023358 | -0.057744349752 | 1.043420382201  |
| C    | -1.721591926135 | 1.106582621101  | 0.129136736668  |
| H    | -1.040224185196 | 0.101162483750  | 4.391109361800  |

|   |                 |                 |                 |
|---|-----------------|-----------------|-----------------|
| H | -0.542155889816 | 2.420918849477  | -2.677583550381 |
| H | -2.345784575177 | -2.020657845408 | 4.285962464644  |
| H | -2.427010516745 | 4.015753528332  | -2.294183252974 |
| H | -3.421472745050 | -2.677080402891 | 2.104364028114  |
| H | -3.881541294427 | 3.699299520880  | -0.268011102613 |
| H | -2.871689699528 | -1.388829880817 | 0.047079464758  |
| H | -3.392223353732 | 1.798972563330  | 1.282006449597  |
| O | 3.110973892985  | 1.219997041436  | 1.047703989730  |
| C | 3.845666935418  | -0.046836611094 | 1.264084030463  |
| H | 4.352292422579  | 0.075585490793  | 2.218923839457  |
| H | 4.577115672253  | -0.197159872014 | 0.468031989596  |
| H | 3.139403023828  | -0.876727604314 | 1.316699910520  |
| O | 3.177662861006  | 2.191546233172  | -1.380574500112 |
| C | 4.134034476944  | 3.321747522462  | -1.217764029865 |
| H | 4.875598331601  | 3.062326615024  | -0.461095807579 |
| H | 3.584922120130  | 4.219186578924  | -0.932112700224 |
| H | 4.601903305111  | 3.444675215547  | -2.191256356092 |
| O | 1.503686245337  | 2.958254448174  | 0.343047226160  |
| C | 1.134011285734  | 3.259022187454  | 1.751901609407  |
| H | 2.035588923438  | 3.263337485019  | 2.363839536339  |
| H | 0.418854286717  | 2.516654353981  | 2.112817783127  |
| H | 0.684252239843  | 4.249057153432  | 1.717944932816  |
| C | -0.480289689923 | -1.361716331822 | -2.219330541774 |

|   |                 |                 |                 |
|---|-----------------|-----------------|-----------------|
| O | -1.173803080288 | -2.132628326185 | -2.774629980346 |
| C | 2.184593520979  | -1.434261189644 | -1.439721792111 |
| O | 3.018541701141  | -2.254981231588 | -1.510577442123 |
| C | 0.009134963555  | -0.732271522430 | 0.492829922968  |
| O | 0.593230339601  | -1.573991933964 | 1.193169604684  |

Table S48. Cartesian coordinates (in Å) of the  $T_1/S_0$ -MESX at 5.185 eV of energy ( $T_1$ : -1600.437522,  $S_0$ : -1600.437522 hartree), of *fac*-[Re<sup>I</sup>(bpy)(CO)<sub>3</sub>P(OMe)<sub>3</sub>]<sup>+</sup>.

| Atom | <i>x</i>        | <i>y</i>        | <i>z</i>        |
|------|-----------------|-----------------|-----------------|
| Re   | 0.458277211590  | -0.511142832849 | -0.114507611181 |
| P    | 1.440929752756  | 1.742781028323  | 0.312868458743  |
| N    | -0.463518561520 | -0.317010876615 | 1.706175221587  |
| N    | -1.289946651551 | 0.579471258580  | -1.028838577107 |
| C    | -0.726497931328 | -0.298894522584 | 2.951514283188  |
| C    | -1.104006629469 | 1.363011110649  | -2.118607150942 |
| C    | -2.047971550250 | -0.338684981851 | 3.590223490860  |
| C    | -2.100787250546 | 2.165078010101  | -2.676579762651 |
| C    | -3.214068051644 | -0.694394177821 | 2.999268363064  |
| C    | -3.371016427829 | 2.194293756260  | -2.077230781868 |
| C    | -3.411390397086 | -0.981102481934 | 1.571134264220  |
| C    | -3.606124349890 | 1.398499152346  | -0.970608657790 |

|   |                 |                 |                 |
|---|-----------------|-----------------|-----------------|
| C | -2.868585496761 | -0.288581582071 | 0.592171260315  |
| C | -2.571136959196 | 0.550012405075  | -0.452382856679 |
| H | 0.124315254827  | -0.293678442824 | 3.646552916025  |
| H | -0.109370521187 | 1.370706371810  | -2.539075614762 |
| H | -2.034200165605 | -0.169813205435 | 4.661587562800  |
| H | -1.873574394109 | 2.760845334532  | -3.550959382863 |
| H | -4.087173714554 | -0.841104671908 | 3.630968613378  |
| H | -4.157232620778 | 2.823877804464  | -2.475979264264 |
| H | -4.061473202926 | -1.829373175253 | 1.337443126291  |
| H | -4.573410028735 | 1.378093282879  | -0.485432473173 |
| O | 2.788330420035  | 1.912797913061  | 1.210762392654  |
| C | 4.144612879553  | 1.435605972942  | 0.854321564522  |
| H | 4.828628689200  | 2.013983353542  | 1.471797518732  |
| H | 4.344480015700  | 1.614003777290  | -0.203970753678 |
| H | 4.229812667158  | 0.374071649681  | 1.088137164716  |
| O | 1.789842813382  | 2.450713516621  | -1.105595094599 |
| C | 2.259523016815  | 3.843168255868  | -1.328220118974 |
| H | 3.015735500079  | 4.112656975488  | -0.589066608485 |
| H | 1.403691570243  | 4.517222234902  | -1.273590083353 |
| H | 2.687011089261  | 3.851003197945  | -2.328265909536 |
| O | 0.442511438940  | 2.691809065147  | 1.140997764239  |
| C | 0.746695129974  | 3.880121262166  | 1.980510347159  |
| H | 1.677580574682  | 3.718722688079  | 2.522624938044  |

|   |                 |                 |                 |
|---|-----------------|-----------------|-----------------|
| H | -0.093039241078 | 3.970807389275  | 2.665776114593  |
| H | 0.815253212497  | 4.760437141536  | 1.340490864682  |
| C | -0.413734614697 | -2.248120232576 | -0.453668765586 |
| O | -0.916752257712 | -3.287859406987 | -0.664015383806 |
| C | 1.404537160599  | -0.618153631602 | -1.835842752473 |
| O | 2.001701692966  | -0.689841139736 | -2.848799446024 |
| C | 1.946833781698  | -1.436149946749 | 0.742531489305  |
| O | 2.825836933868  | -2.015926285720 | 1.271673196197  |

Table S49. Cartesian coordinates (in Å) of the  $T_1/S_0$ -MESX at 5.241 eV of energy ( $T_1$ : -1600.435433,  $S_0$ : -1600.435433 hartree), of *fac*-[Re<sup>I</sup>(bpy)(CO)<sub>3</sub>P(OMe)<sub>3</sub>]<sup>+</sup>.

| Atom | <i>x</i>        | <i>y</i>        | <i>z</i>        |
|------|-----------------|-----------------|-----------------|
| Re   | 0.052946691558  | -0.550914189851 | -1.047976289165 |
| P    | 0.898237712305  | 1.171960357543  | 0.517673304221  |
| N    | -1.251271301750 | -1.345810555514 | 0.502637303509  |
| N    | -1.765946339432 | 0.630273801797  | -1.223324245298 |
| C    | -0.933610551687 | -2.392908740296 | 1.327385582582  |
| C    | -1.978213529913 | 1.611485968343  | -2.153418545665 |
| C    | -1.792205565032 | -2.889398689386 | 2.296678208609  |
| C    | -3.152686376931 | 2.333233324268  | -2.230570668789 |
| C    | -3.044890452631 | -2.250653771284 | 2.377199698417  |

|   |                 |                 |                 |
|---|-----------------|-----------------|-----------------|
| C | -4.192006686051 | 2.048004572577  | -1.303942347965 |
| C | -3.439926048293 | -1.213764242406 | 1.589777361027  |
| C | -4.004705175263 | 1.059732372804  | -0.360786666878 |
| C | -2.513472175731 | -0.729268900448 | 0.608577707983  |
| C | -2.784593607998 | 0.328515261015  | -0.307579640884 |
| H | 0.047559717250  | -2.829339026466 | 1.190456894145  |
| H | -1.163873563172 | 1.800529680026  | -2.839964776050 |
| H | -1.496835967353 | -3.715291974879 | 2.930108913695  |
| H | -3.267297745288 | 3.098800372629  | -2.987379699908 |
| H | -0.695522808237 | 1.429355504981  | 2.446313913788  |
| H | -5.123828492003 | 2.600664137259  | -1.339930732528 |
| H | -4.419347810286 | -0.760330740516 | 1.683152337098  |
| H | -4.791644619887 | 0.832760493104  | 0.347490029279  |
| O | 0.218486619596  | 1.105762847185  | 2.295883298938  |
| C | 0.768412919363  | 0.286627912168  | 3.438254614896  |
| H | 0.825704876054  | 0.948121259648  | 4.299571912535  |
| H | 1.753327254126  | -0.039099718853 | 3.116893418291  |
| H | 0.098901253671  | -0.555798903351 | 3.596436565961  |
| O | 2.421053064818  | 1.057099261492  | 0.931263998906  |
| C | 3.457215720977  | 1.975536988522  | 1.492711114871  |
| H | 3.054228041319  | 2.518934073063  | 2.346521661953  |
| H | 3.775353136176  | 2.649569564871  | 0.699064854277  |
| H | 4.270235949125  | 1.322940614931  | 1.798208615856  |

|   |                 |                 |                 |
|---|-----------------|-----------------|-----------------|
| O | 0.462353832779  | 2.663875982282  | 0.232332686428  |
| C | 0.721429331815  | 4.002097010425  | 0.842196176874  |
| H | 0.713984342554  | 3.918053740276  | 1.928530141845  |
| H | -0.095506292575 | 4.629412101506  | 0.496642647048  |
| H | 1.677829424371  | 4.366838100216  | 0.470789864585  |
| C | -0.619854422311 | -1.874863981320 | -2.315353896933 |
| O | -1.025989063712 | -2.672832601832 | -3.077381311951 |
| C | 1.035369327875  | 0.341391426306  | -2.477317575280 |
| O | 1.607065420746  | 0.888529047609  | -3.358360674695 |
| C | 1.597578445993  | -1.674227126012 | -0.657433760419 |
| O | 2.523460876628  | -2.368612982840 | -0.407178151635 |

Table S50. Cartesian coordinates (in Å) of the  $T_1/S_0$ -MESX at 5.365 eV of energy ( $T_1$ : -1600.430888,  $S_0$ : -1600.430888 hartree), of *fac*-[Re<sup>I</sup>(bpy)(CO)<sub>3</sub>P(OMe)<sub>3</sub>]<sup>+</sup>.

| Atom | <i>x</i>        | <i>y</i>        | <i>z</i>        |
|------|-----------------|-----------------|-----------------|
| Re   | 0.244918599300  | 0.690411833410  | -0.273759307520 |
| P    | 1.895514594958  | 1.405613955437  | 1.372395268970  |
| N    | -1.323821438778 | 0.614971217145  | 1.319571586950  |
| N    | -1.167048391910 | 2.338612353588  | -0.644398256834 |
| C    | -1.230955082570 | -0.067828646956 | 2.491372861963  |
| C    | -0.790058871742 | 2.223344460706  | -1.941905834847 |



|   |                 |                 |                 |
|---|-----------------|-----------------|-----------------|
| C | -2.266811252363 | -0.083044253237 | 3.419805579277  |
| C | -1.525348169056 | 1.156227093582  | -2.708902381771 |
| C | -3.442723995416 | 0.631890837467  | 3.149246811354  |
| C | -3.013624016758 | 1.373830295843  | -2.517575533623 |
| C | -3.550370455123 | 1.341968237592  | 1.954806591531  |
| C | -3.444225925644 | 1.745359838259  | -1.278797263474 |
| C | -2.478280644917 | 1.330770584164  | 1.054592880501  |
| C | -2.445148448292 | 1.950912303682  | -0.254122299430 |
| H | -0.313516544712 | -0.609638875746 | 2.671114625663  |
| H | -0.069073668842 | 2.910167257040  | -2.364171881007 |
| H | -2.153096607781 | -0.648442696200 | 4.335604931323  |
| H | -1.230263740345 | 1.065381861028  | -3.755517859454 |
| H | -4.257653454656 | 0.637947732005  | 3.862890182392  |
| H | -3.690441713798 | 1.186453110231  | -3.341839482689 |
| H | -4.439038881618 | 1.914362803574  | 1.720942046166  |
| H | -4.498346990673 | 1.815522291960  | -1.035794054108 |
| O | 2.921340404885  | 0.356836242585  | 2.062998182078  |
| C | 4.002111019758  | -0.406814671541 | 1.397740656806  |
| H | 4.572786896203  | -0.858663898276 | 2.205578242606  |
| H | 4.632032201170  | 0.265857217652  | 0.813456281829  |
| H | 3.570302395556  | -1.180879765480 | 0.761624022668  |
| O | 2.823739038946  | 2.542956641304  | 0.691917597964  |
| C | 3.845094030208  | 3.387841208697  | 1.372414756563  |

|   |                 |                 |                 |
|---|-----------------|-----------------|-----------------|
| H | 4.431296493342  | 2.786670380697  | 2.069252915493  |
| H | 3.337598068269  | 4.203372972275  | 1.888590603980  |
| H | 4.476748757389  | 3.773462549746  | 0.575831781352  |
| O | 1.190721661396  | 2.015617175243  | 2.676375318008  |
| C | 1.705853837454  | 2.154690323381  | 4.066855391823  |
| H | 2.372620705326  | 1.324248019317  | 4.294763508753  |
| H | 0.823709696969  | 2.135207419994  | 4.702593365632  |
| H | 2.222596147661  | 3.110819996236  | 4.152564439332  |
| C | -0.998941160032 | -0.182402156751 | -1.946508861416 |
| O | -1.269995671266 | -1.304047437192 | -2.332019210335 |
| C | 1.667630671037  | 0.880961505505  | -1.593622556269 |
| O | 2.541788913054  | 1.000936844322  | -2.374884853417 |
| C | 0.690548370826  | -1.166020553278 | 0.044762763744  |
| O | 0.837685881043  | -2.326221188816 | 0.185051348843  |

Table S51. Cartesian coordinates (in Å) of the  $T_1/S_0$ -MESX at 5.978 eV of energy ( $T_1$ : -1600.408369,  $S_0$ : -1600.408369 hartree), of *fac*-[Re<sup>I</sup>(bpy)(CO)<sub>3</sub>P(OMe)<sub>3</sub>]<sup>+</sup>.

| Atom | <i>x</i>        | <i>y</i>        | <i>z</i>        |
|------|-----------------|-----------------|-----------------|
| Re   | 1.282623898210  | -0.788452011195 | -0.661530489109 |
| P    | 2.072874631164  | 1.251208763183  | 0.555282135259  |
| N    | -2.116442826304 | -0.965378288600 | 0.410746594752  |

|   |                 |                 |                 |
|---|-----------------|-----------------|-----------------|
| N | -1.726102027341 | 0.381519849970  | -2.018988539247 |
| C | -2.377476276210 | -1.706486146909 | 1.504738284271  |
| C | -2.551705902021 | -0.179754779301 | -2.863303604934 |
| C | -3.356761546039 | -1.372989906650 | 2.449365580067  |
| C | -3.974648469968 | 0.186974201105  | -2.925486992170 |
| C | -4.086233650536 | -0.189605229393 | 2.255283501491  |
| C | -4.406505612901 | 1.413614043975  | -2.325092560273 |
| C | -3.824905390837 | 0.600503073283  | 1.140087993712  |
| C | -3.536556363525 | 1.996687016810  | -1.430978120658 |
| C | -2.841306740372 | 0.187736841214  | 0.196985108072  |
| C | -2.501688822599 | 1.015629061489  | -0.932348153421 |
| H | -1.772636913621 | -2.598938120102 | 1.627916233247  |
| H | -2.149336775554 | -0.815927963593 | -3.647522119610 |
| H | -3.525929728704 | -2.007368295915 | 3.311007012765  |
| H | -4.599894742926 | -0.316203892950 | -3.654531566397 |
| H | -4.842732061969 | 0.113247058483  | 2.971239820876  |
| H | -5.281396918812 | 1.923352745443  | -2.716773910397 |
| H | -4.359092860386 | 1.530921712167  | 0.989172345975  |
| H | -3.554282604748 | 3.048213345082  | -1.166053778765 |
| O | 3.309388962956  | 1.194571482094  | 1.603252501242  |
| C | 4.716660511698  | 0.844956710935  | 1.297297708360  |
| H | 5.289469920307  | 1.169644640311  | 2.162959725040  |
| H | 5.050999679611  | 1.371128846542  | 0.401335170888  |

|   |                |                 |                 |
|---|----------------|-----------------|-----------------|
| H | 4.805918179727 | -0.234713627147 | 1.168857321149  |
| O | 2.467284703501 | 2.366003250804  | -0.546352412753 |
| C | 2.873818695652 | 3.780282043429  | -0.324224696173 |
| H | 3.582968076932 | 3.843548309092  | 0.502554901055  |
| H | 1.981984771534 | 4.374583305229  | -0.121650676045 |
| H | 3.341531114227 | 4.098202613962  | -1.252949589662 |
| O | 0.917657964080 | 1.817224561851  | 1.516410830223  |
| C | 1.035130467445 | 2.675310995117  | 2.726174636251  |
| H | 1.831532860092 | 2.295418889807  | 3.364705741301  |
| H | 0.069109151795 | 2.604414719948  | 3.219860078687  |
| H | 1.236369948396 | 3.703212063918  | 2.422363256898  |
| C | 0.482261917464 | -2.301892758271 | -1.668861569984 |
| O | 0.012199241323 | -3.201957975321 | -2.251133233284 |
| C | 3.023700189396 | -1.277675617481 | -1.232183077666 |
| O | 4.105113397620 | -1.581956759298 | -1.603209392326 |
| C | 1.528244366728 | -1.911230539652 | 0.845217665519  |
| O | 1.665364950415 | -2.603196144336 | 1.794036998809  |

### Selectivity of CO position on the PLS reaction

Table S52. Cartesian coordinates (in Å) of the  $T_1$  state transition state in which the equatorial CO is bent ( $T_1$ -TS(bent)) of *fac*-[Re<sup>I</sup>(bpy)(CO)<sub>3</sub>P(OMe)<sub>3</sub>]<sup>+</sup>. The electronic energy of the  $T_1$

state is -1600.516284 hartree.

| Atom | <i>x</i>        | <i>y</i>        | <i>z</i>        |
|------|-----------------|-----------------|-----------------|
| Re   | 0.328186000000  | -0.451447000000 | 1.059688000000  |
| P    | 1.592258000000  | 0.849569000000  | -0.625236000000 |
| N    | -1.404447000000 | 1.157191000000  | 0.722146000000  |
| N    | -1.191261000000 | -1.121309000000 | -0.648909000000 |
| C    | -1.463975000000 | 2.278355000000  | 1.462610000000  |
| C    | -1.037595000000 | -2.288785000000 | -1.297766000000 |
| C    | -2.448998000000 | 3.246640000000  | 1.291666000000  |
| C    | -1.889115000000 | -2.710061000000 | -2.315220000000 |
| C    | -3.417116000000 | 3.042740000000  | 0.308458000000  |
| C    | -2.950354000000 | -1.881781000000 | -2.678940000000 |
| C    | -3.363255000000 | 1.881343000000  | -0.458015000000 |
| C    | -3.117286000000 | -0.672653000000 | -2.008794000000 |
| C    | -2.342539000000 | 0.948473000000  | -0.230159000000 |
| C    | -2.221963000000 | -0.314156000000 | -0.992457000000 |
| H    | -0.690271000000 | 2.399687000000  | 2.220992000000  |
| H    | -0.194706000000 | -2.905975000000 | -0.985022000000 |
| H    | -2.447667000000 | 4.136188000000  | 1.921526000000  |
| H    | -1.713899000000 | -3.668274000000 | -2.804352000000 |
| H    | -4.207422000000 | 3.775432000000  | 0.139376000000  |
| H    | -3.641803000000 | -2.170246000000 | -3.471790000000 |

|   |                 |                 |                 |
|---|-----------------|-----------------|-----------------|
| H | -4.113864000000 | 1.705761000000  | -1.225787000000 |
| H | -3.940924000000 | -0.014910000000 | -2.278143000000 |
| O | 3.156416000000  | 0.515287000000  | -1.024650000000 |
| C | 3.529610000000  | -0.727669000000 | -1.662134000000 |
| H | 4.521487000000  | -0.558071000000 | -2.100052000000 |
| H | 2.818908000000  | -0.997813000000 | -2.457674000000 |
| H | 3.588518000000  | -1.536082000000 | -0.919706000000 |
| O | 0.790538000000  | 0.864685000000  | -2.057436000000 |
| C | 1.230385000000  | 1.608671000000  | -3.221255000000 |
| H | 2.327557000000  | 1.638498000000  | -3.284882000000 |
| H | 0.824047000000  | 2.629727000000  | -3.179783000000 |
| H | 0.824880000000  | 1.085091000000  | -4.096294000000 |
| O | 1.781999000000  | 2.387717000000  | -0.104067000000 |
| C | 2.707112000000  | 3.362250000000  | -0.652847000000 |
| H | 3.665877000000  | 2.890546000000  | -0.903958000000 |
| H | 2.851574000000  | 4.112448000000  | 0.134714000000  |
| H | 2.270624000000  | 3.840097000000  | -1.541557000000 |
| C | -0.815794000000 | -1.377281000000 | 2.381213000000  |
| O | -1.498357000000 | -1.905036000000 | 3.143368000000  |
| C | 1.343886000000  | -2.133572000000 | 0.760290000000  |
| O | 2.138899000000  | -2.974314000000 | 0.914517000000  |
| C | 1.115675000000  | 0.666261000000  | 2.490040000000  |
| O | 1.747104000000  | 1.128570000000  | 3.347462000000  |

---

Table S53. Cartesian coordinates (in Å) of the  $T_1$  state equilibrium structure in which the equatorial CO is bent ( $T_1$ -min(bent)) of *fac*-[Re<sup>I</sup>(bpy)(CO)<sub>3</sub>P(OMe)<sub>3</sub>]<sup>+</sup>. The electronic energy of the  $T_1$  state is -1600.517437 hartree.

| Atom | <i>x</i>        | <i>y</i>        | <i>z</i>        |
|------|-----------------|-----------------|-----------------|
| Re   | 0.354529000000  | -0.671018000000 | -0.757763000000 |
| P    | 1.477396000000  | 0.668993000000  | 0.983676000000  |
| N    | -1.479115000000 | -0.999599000000 | 0.741880000000  |
| N    | -1.246425000000 | 1.096502000000  | -0.890548000000 |
| C    | -1.540260000000 | -2.079859000000 | 1.539634000000  |
| C    | -1.073482000000 | 2.122881000000  | -1.742360000000 |
| C    | -2.584312000000 | -2.306919000000 | 2.431860000000  |
| C    | -1.982029000000 | 3.170513000000  | -1.860781000000 |
| C    | -3.614054000000 | -1.369245000000 | 2.502358000000  |
| C    | -3.123426000000 | 3.154107000000  | -1.059431000000 |
| C    | -3.558238000000 | -0.249041000000 | 1.677171000000  |
| C    | -3.308693000000 | 2.093857000000  | -0.176077000000 |
| C    | -2.476716000000 | -0.087358000000 | 0.800838000000  |
| C    | -2.351364000000 | 1.072514000000  | -0.109495000000 |
| H    | -0.715464000000 | -2.788194000000 | 1.456874000000  |
| H    | -0.170408000000 | 2.099158000000  | -2.352171000000 |

|   |                 |                 |                 |
|---|-----------------|-----------------|-----------------|
| H | -2.578933000000 | -3.202511000000 | 3.053106000000  |
| H | -1.788940000000 | 3.975659000000  | -2.569592000000 |
| H | -4.451218000000 | -1.505299000000 | 3.188372000000  |
| H | -3.862525000000 | 3.954154000000  | -1.119755000000 |
| H | -4.353412000000 | 0.492338000000  | 1.718174000000  |
| H | -4.194309000000 | 2.064915000000  | 0.455142000000  |
| O | 2.899197000000  | 0.167155000000  | 1.651034000000  |
| C | 4.061432000000  | -0.076313000000 | 0.826784000000  |
| H | 4.883976000000  | -0.288431000000 | 1.520949000000  |
| H | 4.308966000000  | 0.808944000000  | 0.221573000000  |
| H | 3.901184000000  | -0.946841000000 | 0.172488000000  |
| O | 1.794612000000  | 2.175847000000  | 0.409229000000  |
| C | 2.409870000000  | 3.218891000000  | 1.205759000000  |
| H | 3.188579000000  | 2.807698000000  | 1.864301000000  |
| H | 1.641345000000  | 3.735056000000  | 1.799803000000  |
| H | 2.861581000000  | 3.923459000000  | 0.496072000000  |
| O | 0.577681000000  | 0.808007000000  | 2.337957000000  |
| C | 1.078037000000  | 1.124928000000  | 3.663124000000  |
| H | 1.978464000000  | 0.538677000000  | 3.887110000000  |
| H | 0.270134000000  | 0.857438000000  | 4.355287000000  |
| H | 1.294106000000  | 2.199627000000  | 3.745290000000  |
| C | -0.665264000000 | -1.686769000000 | -2.117691000000 |
| O | -1.273629000000 | -2.267576000000 | -2.903389000000 |



|   |                |                 |                 |
|---|----------------|-----------------|-----------------|
| C | 1.432939000000 | 0.203227000000  | -2.169355000000 |
| O | 2.226097000000 | 0.495104000000  | -2.966547000000 |
| C | 1.161822000000 | -2.342687000000 | -0.048721000000 |
| O | 1.890726000000 | -3.239671000000 | 0.102094000000  |

Table S54. Cartesian coordinates (in Å) of the  $T_1$  state transition state for the equatorial CO dissociation ( $T_1$ -TS(dissociation)) of *fac*-[Re<sup>I</sup>(bpy)(CO)<sub>3</sub>P(OMe)<sub>3</sub>]<sup>+</sup>. The electronic energy of the  $T_1$  state is -1600.496104 hartree.

| Atom | <i>x</i>        | <i>y</i>        | <i>z</i>        |
|------|-----------------|-----------------|-----------------|
| Re   | 0.146700000000  | -0.681635000000 | -0.622636000000 |
| P    | 1.378384000000  | 1.182113000000  | 0.448498000000  |
| N    | -1.487028000000 | -0.459991000000 | 0.881067000000  |
| N    | -1.238789000000 | 0.886677000000  | -1.383777000000 |
| C    | -1.526970000000 | -1.164544000000 | 2.030180000000  |
| C    | -1.041540000000 | 1.512243000000  | -2.562678000000 |
| C    | -2.545326000000 | -1.014067000000 | 2.966014000000  |
| C    | -1.956561000000 | 2.419042000000  | -3.087230000000 |
| C    | -3.565911000000 | -0.099634000000 | 2.704410000000  |
| C    | -3.114431000000 | 2.699910000000  | -2.359710000000 |
| C    | -3.530697000000 | 0.629040000000  | 1.517851000000  |
| C    | -3.314963000000 | 2.064606000000  | -1.136374000000 |

|   |                 |                 |                 |
|---|-----------------|-----------------|-----------------|
| C | -2.479071000000 | 0.432797000000  | 0.616153000000  |
| C | -2.360009000000 | 1.157330000000  | -0.664415000000 |
| H | -0.711746000000 | -1.868505000000 | 2.193335000000  |
| H | -0.120159000000 | 1.269894000000  | -3.092327000000 |
| H | -2.527849000000 | -1.609319000000 | 3.878655000000  |
| H | -1.753226000000 | 2.894351000000  | -4.046633000000 |
| H | -4.381428000000 | 0.046654000000  | 3.413744000000  |
| H | -3.853817000000 | 3.407043000000  | -2.737397000000 |
| H | -4.316566000000 | 1.349193000000  | 1.298688000000  |
| H | -4.212614000000 | 2.271164000000  | -0.556821000000 |
| O | 2.557906000000  | 0.921875000000  | 1.576045000000  |
| C | 3.753260000000  | 0.187131000000  | 1.235447000000  |
| H | 4.310690000000  | 0.062763000000  | 2.172177000000  |
| H | 4.364633000000  | 0.748862000000  | 0.512686000000  |
| H | 3.506056000000  | -0.803036000000 | 0.822295000000  |
| O | 2.105641000000  | 2.112082000000  | -0.698606000000 |
| C | 2.856982000000  | 3.313696000000  | -0.396423000000 |
| H | 3.397938000000  | 3.217374000000  | 0.556073000000  |
| H | 2.175556000000  | 4.176399000000  | -0.359712000000 |
| H | 3.575202000000  | 3.446404000000  | -1.215678000000 |
| O | 0.376719000000  | 2.126200000000  | 1.331643000000  |
| C | 0.773595000000  | 3.066854000000  | 2.362024000000  |
| H | 1.579561000000  | 2.650011000000  | 2.979672000000  |

|   |                 |                 |                 |
|---|-----------------|-----------------|-----------------|
| H | -0.121350000000 | 3.235804000000  | 2.973977000000  |
| H | 1.093389000000  | 4.015406000000  | 1.907103000000  |
| C | -0.823169000000 | -2.256225000000 | -1.290115000000 |
| O | -1.398345000000 | -3.191059000000 | -1.656072000000 |
| C | 1.714885000000  | -0.898482000000 | -1.807360000000 |
| O | 2.633703000000  | -1.019909000000 | -2.496752000000 |
| C | 1.571721000000  | -2.790426000000 | 0.582086000000  |
| O | 1.210295000000  | -3.138139000000 | 1.618993000000  |

Table S55. Cartesian coordinates (in Å) of the  $T_1$  state transition state in which the equatorial CO is bent ( $T_1$ -TS(bent)) of *fac*-[Re<sup>I</sup>(bpy)(CO)<sub>3</sub>Cl]. This TS are obtained as the  $T_2/T_1$ -MECI by the TD-B3LYP calculation. The electronic energy of the MECI is -1374.101169 ( $T_2$ : -1374.101166,  $T_1$ : -1374.101171) hartree.

| Atom | <i>x</i>        | <i>y</i>        | <i>z</i>       |
|------|-----------------|-----------------|----------------|
| C    | -3.365791373446 | 0.092553288055  | 1.481859635549 |
| C    | -3.281466307421 | 0.007373213743  | 2.864116218932 |
| C    | -2.200453726174 | -0.011635011562 | 0.698519942797 |
| H    | -4.180904965846 | 0.091187931248  | 3.475889526661 |
| C    | -2.023433205626 | -0.184193692594 | 3.455928031366 |
| N    | -0.976023263716 | -0.179869756072 | 1.286610703521 |
| H    | -1.904674402279 | -0.270463091446 | 4.535955729592 |
| C    | -0.909565846122 | -0.262216891755 | 2.631481547796 |

|    |                 |                 |                 |
|----|-----------------|-----------------|-----------------|
| H  | 0.090342134842  | -0.402033247414 | 3.046169032617  |
| H  | -4.332375005210 | 0.250250445528  | 1.006391513853  |
| C  | -2.208081520130 | 0.063223488601  | -0.760198196576 |
| N  | -0.979834864562 | 0.086420571287  | -1.371766189749 |
| C  | -3.385680869997 | 0.112493165666  | -1.529806534949 |
| C  | -0.919974028442 | 0.175640891002  | -2.721224366296 |
| C  | -3.310280792112 | 0.215964297357  | -2.910860644102 |
| C  | -2.045526080785 | 0.260404906151  | -3.524281125992 |
| H  | -4.358083199004 | 0.062675511880  | -1.042881396529 |
| H  | 0.079621194392  | 0.180548897717  | -3.155946822005 |
| H  | -4.221755283943 | 0.254116091106  | -3.509100426862 |
| H  | -1.934413832109 | 0.347842793267  | -4.604800814096 |
| Re | 0.841792114064  | -0.119242573025 | -0.077529742294 |
| C  | 2.049034500201  | -0.557565139385 | 1.506259098663  |
| C  | 0.888843834816  | -2.024982843324 | -0.509900898174 |
| C  | 2.202527178895  | 0.075095550940  | -1.449354769311 |
| Cl | 0.934063300648  | 2.300287157003  | 0.423685200284  |
| O  | 0.942646550073  | -3.147712381415 | -0.781454135912 |
| O  | 3.061652555907  | -0.658974552151 | 2.082980689460  |
| O  | 3.027883293911  | 0.187518241807  | -2.256600728734 |

---

Table S56. Cartesian coordinates (in Å) of the  $T_1$  state equilibrium structure in which the equatorial CO is bent ( $T_1$ -min(bent)) of *fac*-[Re<sup>I</sup>(bpy)(CO)<sub>3</sub>Cl]. The electronic energy of the  $T_1$  state is -1374.108645 hartree.

| Atom | <i>x</i>        | <i>y</i>        | <i>z</i>        |
|------|-----------------|-----------------|-----------------|
| C    | -3.174849743450 | -0.217030661916 | 1.102379077955  |
| C    | -3.277876675818 | -0.241954553705 | 2.491587371715  |
| C    | -1.922815477445 | -0.390836650935 | 0.499237784558  |
| H    | -4.248342213160 | -0.106231642379 | 2.970930643613  |
| C    | -2.126692413604 | -0.446502751334 | 3.253715445383  |
| N    | -0.808044986549 | -0.573212153957 | 1.249380723779  |
| H    | -2.158114931416 | -0.482153811533 | 4.342604857900  |
| C    | -0.913573302897 | -0.609542325427 | 2.591733879967  |
| H    | 0.011921916549  | -0.773945414414 | 3.144065785273  |
| H    | -4.064875737773 | -0.059193196869 | 0.496486858823  |
| C    | -1.718952322414 | -0.397884130166 | -0.966433029497 |
| N    | -0.432886282625 | -0.513015255217 | -1.389973480273 |
| C    | -2.778589779456 | -0.303252989683 | -1.876976415252 |
| C    | -0.187843651359 | -0.527181129217 | -2.712673845129 |
| C    | -2.514808463375 | -0.316741821795 | -3.244784015495 |
| C    | -1.192348036544 | -0.428002992759 | -3.671853351203 |
| H    | -3.804934360366 | -0.224581449906 | -1.524081871273 |
| H    | 0.861730239236  | -0.632040650979 | -2.993543569699 |
| H    | -3.332963540851 | -0.243702483452 | -3.962710867973 |

|    |                 |                 |                 |
|----|-----------------|-----------------|-----------------|
| H  | -0.931062846960 | -0.442263031438 | -4.730135231358 |
| Re | 1.220028876240  | -0.589054582213 | 0.197141358598  |
| C  | 2.491247882920  | -0.569978852397 | 1.662191854452  |
| C  | 1.269212770293  | -2.524094673654 | 0.430406484414  |
| C  | 2.594812159817  | -0.835067587234 | -1.360496466267 |
| Cl | 1.181798535894  | 1.889134462997  | 0.019310136486  |
| O  | 1.321858768900  | -3.668936867067 | 0.601616420610  |
| O  | 3.251171439036  | -0.576967725372 | 2.538823661985  |
| O  | 3.745015766536  | -0.585065210970 | -1.518957948742 |

Table S57. Cartesian coordinates (in Å) of the  $T_1$  state transition state for the equatorial CO dissociation ( $T_1$ -TS(dissociation)) of *fac*-[Re<sup>I</sup>(bpy)(CO)<sub>3</sub>Cl]. The electronic energy of the  $T_1$  state is -1374.091014 hartree.

| Atom | <i>x</i>        | <i>y</i>        | <i>z</i>       |
|------|-----------------|-----------------|----------------|
| C    | -3.467707961875 | -0.271048144754 | 1.617554173415 |
| C    | -3.401012197013 | -0.268479572241 | 3.009030366409 |
| C    | -2.289623115635 | -0.216254829432 | 0.864079493806 |
| H    | -4.315816823701 | -0.311517629417 | 3.601505432121 |
| C    | -2.149964305815 | -0.210700512443 | 3.626226819217 |
| N    | -1.069866833774 | -0.170032265640 | 1.476151882609 |
| H    | -2.046128429189 | -0.201524265678 | 4.711147320319 |
| C    | -1.014168991157 | -0.164066875163 | 2.826331932397 |

|    |                 |                 |                 |
|----|-----------------|-----------------|-----------------|
| H  | -0.017682519398 | -0.116016993027 | 3.262929235442  |
| H  | -4.435882210556 | -0.320277285677 | 1.123084578423  |
| C  | -2.279252344983 | -0.210354555634 | -0.615676854269 |
| N  | -1.051072703733 | -0.246221701970 | -1.199921124337 |
| C  | -3.445883835962 | -0.166812577795 | -1.389424438091 |
| C  | -0.965505671874 | -0.235096547999 | -2.544867232241 |
| C  | -3.349640260413 | -0.162536675423 | -2.779068205456 |
| C  | -2.085449557947 | -0.197181978195 | -3.369888339996 |
| H  | -4.424326529564 | -0.129317676816 | -0.914627798005 |
| H  | 0.043517732445  | -0.252090233821 | -2.956755699381 |
| H  | -4.252251826026 | -0.128563117281 | -3.390653146474 |
| H  | -1.959269025866 | -0.192544160834 | -4.452520447188 |
| Re | 0.696685335031  | -0.257810585289 | 0.170476851604  |
| C  | 2.060777380264  | -0.204626720863 | 1.504214758292  |
| C  | 1.538715191967  | -1.867153244523 | -0.544972579470 |
| C  | 2.431778032011  | 0.601059261332  | -1.822949335346 |
| Cl | 0.533658795084  | 2.263056397641  | 0.130080704571  |
| O  | 2.023758476082  | -2.848112405306 | -0.946801915256 |
| O  | 2.873617309086  | -0.158308719708 | 2.345702808739  |
| O  | 3.540421782406  | 0.839153513307  | -1.654364442210 |

---

Table S58. Cartesian coordinates (in Å) of the  $T_3/S_1$ -MESX at 3.100 eV of energy ( $T_3$ : -1600.514121,  $S_1$ : -1600.514151 hartree), of *fac*-[Re<sup>I</sup>(bpy)(CO)<sub>3</sub>P(OMe)<sub>3</sub>]<sup>+</sup>.

| Atom | <i>x</i>        | <i>y</i>        | <i>z</i>        |
|------|-----------------|-----------------|-----------------|
| Re   | 0.201405147664  | -0.876262268358 | -0.448237119662 |
| P    | 1.454243717252  | 0.984709584166  | 0.657501779054  |
| N    | -1.323561680456 | -0.649968397673 | 1.070597646149  |
| N    | -1.074768503537 | 0.693529720202  | -1.219517834252 |
| C    | -1.378846400135 | -1.344270200812 | 2.240321685288  |
| C    | -0.893465372879 | 1.342312256831  | -2.403807342371 |
| C    | -2.384847381955 | -1.185670135391 | 3.167452353972  |
| C    | -1.770977399360 | 2.285550228410  | -2.888962034803 |
| C    | -3.418971081042 | -0.250948792488 | 2.892560907107  |
| C    | -2.924037506871 | 2.601156416962  | -2.118232059986 |
| C    | -3.382673047504 | 0.461994582038  | 1.717014346423  |
| C    | -3.124529053487 | 1.960154542216  | -0.918409371858 |
| C    | -2.325816897603 | 0.276708037215  | 0.782904511711  |
| C    | -2.198226559530 | 0.988758948418  | -0.445549127943 |
| H    | -0.572581109277 | -2.054218231443 | 2.424661647148  |
| H    | -0.000025187699 | 1.080354444317  | -2.970805614480 |
| H    | -2.371928228188 | -1.774277783016 | 4.083859951929  |
| H    | -1.567168305927 | 2.772057030491  | -3.842083238238 |
| H    | -4.234879564913 | -0.100614746407 | 3.600942568663  |



|   |                 |                 |                 |
|---|-----------------|-----------------|-----------------|
| H | -3.639758929989 | 3.345015980298  | -2.470764959217 |
| H | -4.166586207644 | 1.184220143348  | 1.493753264851  |
| H | -4.005096233229 | 2.190340979609  | -0.320289538454 |
| O | 2.736021846826  | 0.718043715391  | 1.652278567550  |
| C | 3.973597754675  | 0.131954475292  | 1.189559013051  |
| H | 4.694745541238  | 0.277360353850  | 2.003283628249  |
| H | 4.332784844530  | 0.634304349261  | 0.279497545628  |
| H | 3.847248901848  | -0.944734439592 | 1.001274945281  |
| O | 2.014954401549  | 1.953234972234  | -0.541726637637 |
| C | 2.626381952256  | 3.245674539919  | -0.301491526513 |
| H | 3.374245423011  | 3.186105475010  | 0.502324286996  |
| H | 1.850432445722  | 3.982492415186  | -0.048401467972 |
| H | 3.114167798981  | 3.530652800559  | -1.241593048087 |
| O | 0.511146743977  | 1.861456990017  | 1.650345146934  |
| C | 0.950822358672  | 2.661065733737  | 2.782454851283  |
| H | 1.868204723353  | 2.247207222077  | 3.218480917853  |
| H | 0.133619138493  | 2.624072024595  | 3.513701254158  |
| H | 1.116353667522  | 3.697932850240  | 2.457014366027  |
| C | -0.939698357722 | -2.230980820027 | -1.365340853683 |
| O | -1.591854835124 | -3.002684071381 | -1.901832049120 |
| C | 1.546301054970  | -0.895157958226 | -1.955861595532 |
| O | 2.305842642292  | -0.914252692011 | -2.810899703217 |
| C | 1.219876118891  | -2.351784924162 | 0.479978951228  |

O

1.775213620756

-3.211046351183

0.992691986576

---
